# 1 **Excitation creates a distributed pattern of cortical suppression** 2 **due to varied recurrent input**

3  
4 Jonathan F O'Rawe<sup>1</sup>, Zhishang Zhou<sup>1</sup>, Anna J Li<sup>1,4</sup>, Paul K LaFosse<sup>1,2,3</sup>, Hannah C Goldbach<sup>1,5</sup>,  
5 Mark H Histed<sup>1,\*</sup>

- 6 1. **National Institute of Mental Health Intramural Program, National Institutes of Health,**  
7 **Bethesda MD USA.**
- 8 2. **National Institutes of Health-University of Maryland Graduate Partnerships Program,**  
9 **Bethesda, MD USA**
- 10 3. **Neuroscience and Cognitive Science Program, University of Maryland College Park,**  
11 **College Park, MD USA**
- 12 **Current affiliations:**
- 13 4. **Department of Biological Structure, University of Washington, Seattle WA USA**
- 14 5. **National Eye Institute Intramural Program, National Institutes of Health, Bethesda MD USA**

## 15 **Summary**

16 Dense local, recurrent connections are a major feature of cortical circuits, yet how they affect  
17 neurons' responses is unclear, with some studies reporting weak recurrent effects, some  
18 amplification, and others showing instead local suppression. Here, we show that optogenetic  
19 input to mouse V1 excitatory neurons generates salt-and-pepper patterns of both excitation and  
20 suppression. Responses in individual neurons are not strongly predicted by that neuron's direct  
21 input. A balanced-state network model reconciles a set of diverse observations: the observed  
22 dynamics, suppressed responses, decoupling of input and output, and long tail of excited  
23 responses. The model shows recurrent excitatory-excitatory connections are strong and also  
24 variable across neurons. Together, these results demonstrate that excitatory recurrent  
25 connections can have major effects on cortical computations, by shaping and changing neurons'  
26 responses to input.

---

\* Correspondence and Lead Contact: [mark.histed@nih.gov](mailto:mark.histed@nih.gov)

## Introduction

27 The cerebral cortex of mammals is specialized into areas that perform different functions<sup>1</sup>.  
28 Animals from rodents to primates have several different visual cortical areas, each containing  
29 neurons with different types of selectivity<sup>2-4</sup>. In principle, these different representations in  
30 different visual areas could be created purely by feedforward mechanisms, where  
31 transformations happen via projections from one area or layer to the next, without outputs of a  
32 neuron feeding back (directly or indirectly) to influence that neuron's activity. In fact, in a variety  
33 of artificial neural networks, much or all computation is provided by feedforward mechanisms<sup>5</sup>.

34 Yet in the brains of animals and humans, cortical recurrent connectivity is extensive. Most  
35 excitatory connections that a cortical neuron receives originate within a few hundred microns of  
36 their cell bodies<sup>6-8</sup>. Such recurrent connections can in principle have large effects on neural  
37 computation<sup>9</sup>, dramatically changing how cortical neurons respond to input.

38 How recurrent connections affect cortical computation is not fully understood, but important  
39 aspects of the structure of cortical recurrent connectivity have been determined. Some features  
40 of cortical network activity, such as irregular firing, are well-described by balanced-state models  
41 which assume strong recurrent coupling between excitatory and inhibitory neurons (either  
42 moderately strong, yielding 'loose balance', or very strong, yielding 'tight balance'<sup>10</sup>). Work using  
43 inhibitory perturbations has shown that not just excitatory-inhibitory connectivity is strong, but  
44 the average excitatory-excitatory connectivity is strong as well. More precisely, cortical recurrent  
45 excitatory coupling is strong enough that the excitatory network is unstable and self-amplifying,  
46 a phenomenon described by inhibition-stabilized network models (ISNs)<sup>11-14</sup>.

47 While some consensus has developed on these average cortical connectivity properties (but  
48 see<sup>15</sup>), the effect recurrent connections have on transforming sensory or input signals has been  
49 less clear. For example, some recent studies have shown that certain patterns of excitatory  
50 input can be amplified by the cortical network<sup>16,17</sup>, consistent with some theoretical  
51 predictions<sup>18,19</sup>. On the other hand, however, some studies have shown that nearby neurons can  
52 be substantially suppressed by stimulation that excites a single or a small ensemble of  
53 excitatory cortical neurons<sup>20,21</sup>. How excitatory and inhibitory neurons might interact through  
54 recurrent connections to create such suppression has not been determined.

55 Here, to understand how cortical neurons' responses are shaped by the cortical recurrent  
56 network, we stimulate excitatory cells in the visual cortex optogenetically and record responses  
57 of local neurons with electrophysiology and two-photon imaging. First, we find that stimulation of  
58 excitatory cells leads to a salt-and-pepper pattern of local suppression, consistent with the  
59 pattern of excited and suppressed cells produced when animals see a strong visual stimulus. To  
60 understand how this suppression effect might arise from cortical recurrent circuitry, we examine  
61 both the patterns of firing rate changes and the dynamics of responses. Recent theoretical work  
62 has shown that cortical visual responses can be "reshuffled" by additional excitatory input<sup>22</sup> —  
63 that is, strong average recurrent coupling allows individual neurons' firing to change significantly  
64 in response to input while the distribution of population activity is little-changed<sup>23,24</sup>. We  
65 implement this scenario in a conductance-based simulation and find that it can explain the

66 suppression we observe. In addition, our data is consistent with substantial variability in local  
67 recurrent connectivity, with some neurons receiving large net recurrent excitation and others  
68 smaller or net suppressive recurrent input. Our results go beyond prior work that found strong  
69 *average* recurrent connectivity, showing that *variance* in excitatory-excitatory connectivity must  
70 also be substantial, and further show that this variance in recurrent connectivity can decouple  
71 neurons' firing rate responses from the direct input they receive.

72 The suppression we observe during excitatory cell stimulation occurs in individual cells, but the  
73 mean response is elevated. This increase in mean, however, seems at odds with the prior  
74 finding that single-cell stimulation leads to inhibition on average<sup>20</sup>. To resolve this, we simulate  
75 the effect of single cell stimulation and find that the difference in the two results can be  
76 explained by the activation state of the cortical network. Increasing activity in the network with  
77 visual stimulation results in a slight decrease in mean responses to stimulation, showing the  
78 prior results and our current results can be described in the same model framework.

79 Thus, a balanced-state cortical model, with strong average coupling and variability in recurrent  
80 connectivity, explains many features of our data, including dynamics and neural response  
81 distributions. These results show how cortical neural suppression can be generated from  
82 excitatory input: variability in recurrent input means that firing rate responses are decoupled  
83 from (are only weakly affected by) the level of excitatory input we provide to that cell. This arises  
84 because much of the input a cell receives comes from recurrent sources. Because recurrent  
85 input varies from cell to cell, the result is many excited cells, but also a substantial number of  
86 suppressed neurons.

## 87 Results

### 88 ***Strong visual input leads to salt-and-pepper distributed suppression in primary*** 89 ***visual cortex***

90 We first measured local patterns of suppression in visual cortex in response to visual stimuli.  
 91 We presented small high-contrast visual stimuli to headfixed mice while measuring activity in V1  
 92 layer 2/3 neurons via two-photon imaging (Fig. 1A). We expressed GCaMP7s in all neurons via  
 93 viral injection (AAV-hSyn-GCaMP). Animals were kept awake and in an alert state<sup>25</sup> with  
 94 occasional drops of water reward.

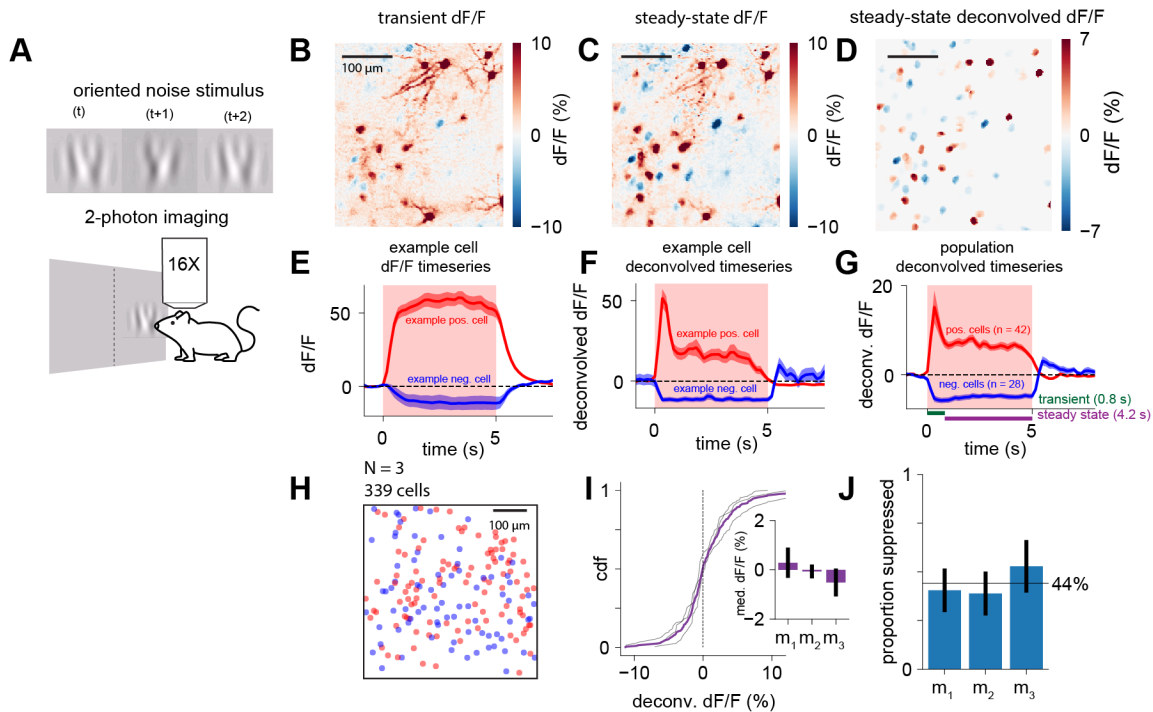

96 **Figure 1: V1 neurons show salt-and-pepper suppression to strong visual stimuli.** (A) Experimental setup.  
 97 Awake mice viewed a small (15 degree diameter) visual stimulus with rapidly changing frames of oriented noise  
 98 (Methods). (B) Example 2-photon imaging data from layer 2/3 of V1 in response to the stimulus, during the transient  
 99 and (C) steady-state periods. Time intervals used for averaging in (B-D) displayed in green and purple in (G).  
 100 Intermixed (salt-and-pepper) elevated and suppressed responses emerge during the steady-state period. (D)  
 101 Deconvolved responses from (C), projected onto segmented cell masks (Methods). (E) Example dF/F trace for one  
 102 elevated and one suppressed cell. Shaded regions: SEM across trials. Shaded red: optogenetic stimulation duration.  
 103 (F) Deconvolution of the traces in (E) reveals an initial transient period and then a steady-state response. (G)  
 104 Average response for all elevated and suppressed cells in (B-D, N = 1, pos. neurons = 42, neg. neurons = 28). (H)  
 105 Spatial distribution of elevated (red) and suppressed (blue) cells collapsed across animals (N = 3; 339 neurons),  
 106 showing random distribution of neurons across the cortex (statistical analysis; Fig. S1F-H). (I) Visual response  
 107 amplitudes are similar across animals. Thin lines: CDFs for individual animals, thick line: population CDF. Inset:  
 108 medians are near zero,  $m_1$ - $m_3$ : individual animals, error bars:  $\pm$  SEM. (J) Proportion of cells suppressed in each  
 109 mouse. Error bars: Wilson score 95% confidence intervals. Black line: group mean (44%  $\pm$  7%). See also Fig. S1.

110 We imaged responses to two types of high-contrast visual stimuli, a fast-changing stimulus  
111 designed to minimize adaptation (“oriented noise”, Fig. 1A)<sup>26–28</sup> and a drifting grating (Fig. S1D).  
112 We found a salt-and-pepper mix of suppressed and excited cells (Fig. 1B,C), with suppression  
113 stronger after the initial stimulus response (Fig. 1C). In other words, in response to both types of  
114 visual stimuli, we found some cells that responded with strongly elevated steady-state  
115 responses, and other cells that showed suppressed responses (Fig. 1C–F, Fig. S1A–E).

116 Deconvolving fluorescence responses to yield a proxy measure of spike rate confirmed this salt-  
117 and-pepper pattern, with substantial numbers of suppressed and excited neurons intermingled  
118 (Fig. 1D). The deconvolution revealed an initial transient response in excited cells (Fig 1F,G),  
119 followed by either an elevated or suppressed steady state.

120 We confirmed that the spatial distribution of elevated and suppressed neurons was randomly  
121 scattered across the cortex (Fig. 1H). We found our data was consistent with random scatter  
122 (data vs 2d Poisson process model for spatial randomness,  $p > 0.05$ , Bonferroni correction, Fig.  
123 S1F–H).

124 The viral expression strategy we used for these experiments results in both excitatory and  
125 inhibitory neurons that express GCaMP. However, the large fraction of suppressed neurons  
126 (Fig. 1D,H–J; proportion suppressed  $44\% \pm 7\%$ ,  $N=3$  animals, mean  $\pm$  standard error) implies  
127 that it is not that a group of inhibitory neurons was suppressed by stimulation, but that many  
128 excitatory neurons were suppressed. Below, we confirm with electrophysiology and imaging that  
129 optogenetic excitatory input produces suppression in many excitatory cells.

### 130 ***Optogenetic excitatory drive also results in sparse and distributed suppression***

131 To examine the influence of recurrent excitatory-inhibitory circuits on local response properties,  
132 we next measured V1 responses while optogenetically stimulating excitatory cortical cells (Fig.  
133 2A). Direct stimulation allows us to exclude some feedforward mechanisms for  
134 suppression — for example, to argue against the possibility that cortical suppression is  
135 generated principally by suppression of thalamic inputs<sup>29</sup>.

136 We injected a Cre-dependent excitatory opsin (soma-targeted ChrimsonR, or stChrimsonR) in  
137 layer 2/3 of a mouse expressing Cre in excitatory neurons only (*Emx1-Cre*<sup>30</sup>), and expressed  
138 GCaMP7s in all neurons with a second virus (AAV-hSyn-GCaMP7s) (Fig. 2B,E).

139 With optogenetic stimulation we also found a clear salt-and-pepper distribution of elevated and  
140 suppressed responses (Fig. 2C,F,H; short stimulation pulses Fig. 2B–D, long pulses with  
141 imaging of steady-state during stimulation, Fig. 2E–G). Neural responses to stimulation increase  
142 as power increases (Fig. 2D; asymptote may be due to opsin saturation.) As in the case of  
143 visual responses, we confirmed that the spatial patterns of responses were compatible with  
144 random scattering (all  $p$ 's  $> 0.05$ , Fig. S1F–H). The proportion of suppressed neurons with  
145 optogenetic stimulation (Fig. 2I,J;  $38\% \pm 8\%$ , mean  $\pm$  SEM) was comparable to that seen with  
146 visual stimulation (Fig. 1I,J). These optogenetic data suggest that the network is being driven to  
147 a new steady state or fixed point by input. While there was a slight decay in the excited  
148 population's response at high power (perhaps due to network effects, spike rate adaptation, or

149 opsin desensitization), at moderate stimulation power (1 mW, Fig. 2G), deconvolved firing rates  
 150 are largely constant while stimulation is on.

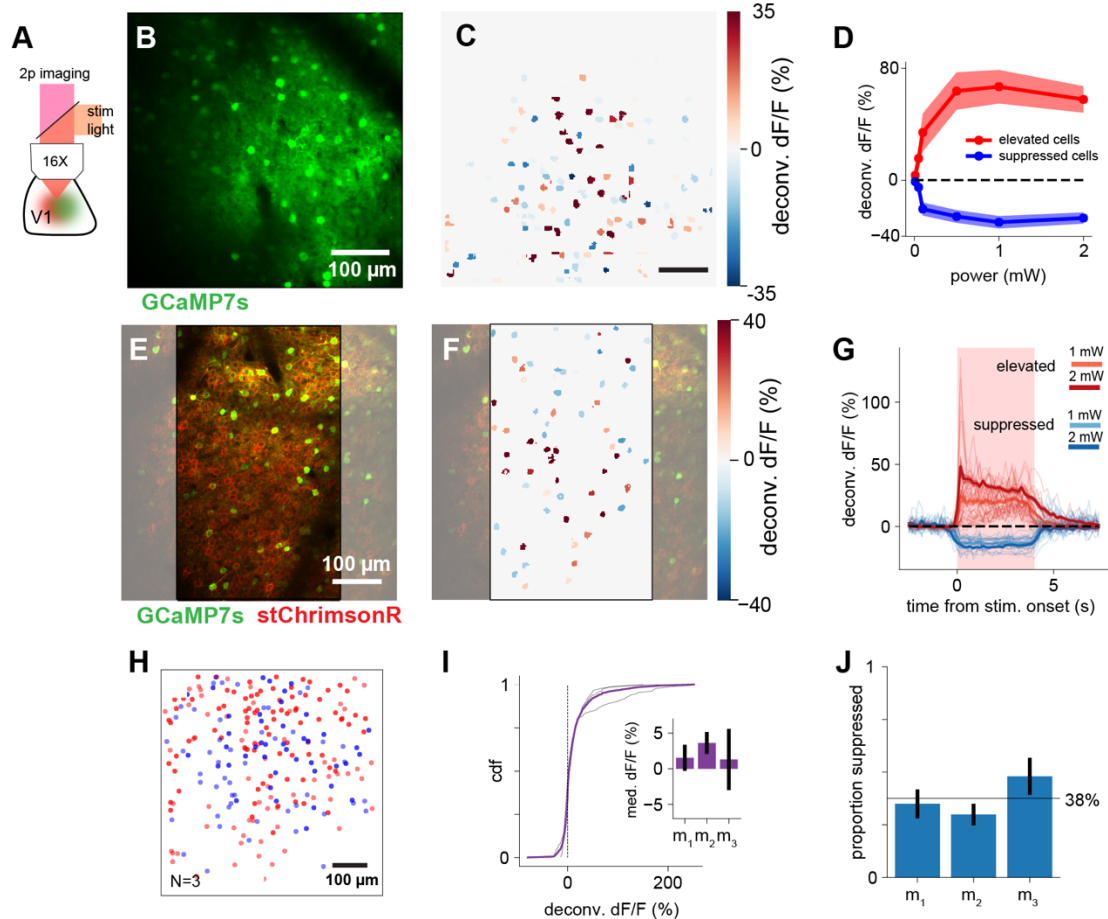

151

152 **Figure 2: Salt-and-pepper elevation and suppression to optogenetic excitation.** (A) Experimental setup, using  
 153 two-photon imaging (GCaMP7s, all cells, 920nm) and optogenetic excitation of excitatory neurons (stChrimsonR,  
 154 595nm). (B) Example field of view. (C) Deconvolved steady-state response (scaled to match dF/F %) to optogenetic  
 155 stimulation (200 ms duration) from (B). Red: elevation of firing rate relative to baseline, blue: suppression. (D)  
 156 Increasing power leads to stronger elevation and suppression (steady-state response) in their respective populations.  
 157 Shaded region: SEM across cells. (E) Field of view from an example animal stimulated with long (4 sec) optogenetic  
 158 pulses; stimulation during imaging flyback (Methods). Gray: areas omitted from analysis to exclude stimulation  
 159 artifact. (F) Deconvolved response to stimulation, conventions same as (C). (G) Population timecourses for cells in  
 160 (F). Red region: optogenetic stimulation period. Steady-state response averaging period: 200- 3750 ms. Light lines:  
 161 individual cell traces, heavy lines: population averages. Shaded region (largely obscured by thick lines): SEM across  
 162 cells. (H) Spatial distribution of elevated (red) and suppressed (blue) cells collapsed across all animals (N = 3), same  
 163 conventions as Fig 1H. Statistical analysis: Fig. S1F-H. (I) Optogenetic response amplitudes are similar across  
 164 animals. Conventions as in Fig. 1I. (J) Proportion of cells suppressed by optogenetic stimulation in each mouse. Error  
 165 bars: Wilson score 95% confidence intervals. Black line: group mean (38% ± 8%).

166

167 We confirmed the opsin we used was expressed only in excitatory cells using fluorescence in-  
168 situ hybridization. We labeled excitatory, inhibitory, and stChrimsonR-expressing neurons  
169 (RNAScope, ACD Inc; Fig. S2A,B). Excitatory neurons expressed the opsin (Fig. 2I), but as  
170 expected for AAV expression<sup>31</sup>, not all excitatory neurons were opsin-positive (59%, N =  
171 115/195, Wilson score 95% CI: [52.0%,65.7%], Fig. S2A). None of the inhibitory neurons (24%  
172 of neurons in the sample, N = 62/257) showed expression of the opsin (Fig. S2B).

173 The two-photon imaging experiments showed a salt-and-pepper pattern of excitation and  
174 suppression within the imaging fields of view. To examine whether this salt-and-pepper pattern  
175 exists at larger distances from the stimulation site, we used electrophysiology. We recorded  
176 neural responses to stChrimsonR stimulation using a silicon electrode array (Fig. 3A,E) and the  
177 same viral strategy for opsin expression as we used with imaging.

178 We found both elevation and suppression across all distances (Fig. 3B–D) and depths (Fig. 3F–  
179 H) from the stimulation site, suggesting a similar salt-and-pepper organization of elevated and  
180 suppressed cells extends over distance. Across the population of recorded neurons, 56.6% (77  
181 of 136) showed an elevated steady-state response to the optogenetic stimulation, and 36.0%  
182 (49 of 136) showed a suppressed steady-state response, comparable to our two-photon  
183 measurements (Fig. 2). Both elevated and suppressed cells on average showed an initial  
184 (positive) transient followed by a (positive or negative) steady-state response (Fig. 3I,J).

185 The electrophysiological recordings show similar dynamics as the deconvolved imaging  
186 timecourses (Fig. 2H), except for one feature: the recordings show an initial brief positive  
187 transient in the suppressed cells (Fig. 3B–D, F–H, blue lines; Fig. 3J) not just in the elevated  
188 cells as in the imaging data. This transient is likely concealed in the imaging data due to the  
189 slower timescale of imaging. The imaging frame rate (30 Hz; 33 ms frames) is slower than the  
190 transient, so within one frame the positive transient would be averaged with suppression,  
191 yielding a result near zero. In the case of elevated cells, the positive transient is averaged with  
192 an elevated steady state, and so the response in that frame remains positive.

### 193 ***Global spatial patterns arise from trends in local salt-and-pepper suppression***

194 The neurophysiology data showed some evidence of a larger-scale organization on top of the  
195 local salt-and-pepper distribution of elevation and suppression. Over distances of more than a  
196 millimeter from the stimulation site, we found that the number of elevated units gradually  
197 decreased (Fig. 3K,L; Pearson's chi-squared test,  $\chi^2 = 51.31$ ,  $df = 3$ ,  $p < 0.001$ ) and the number  
198 of suppressed units gradually increased (Fig. 3M,N;  $\chi^2 = 44.83$ ,  $df = 3$ ,  $p < 0.001$ ; see Fig. S2E-  
199 H for unit counts as a proportion of total units). There was also a similar trend in neurons' firing  
200 rates (Fig. S2I,J). Elevated single units showed less elevated firing rate with distance from the  
201 stimulation site, and suppressed single units showed more suppression with distance from the  
202 stimulation site, though the linear trend between distance and population response was stronger  
203 in unit counts than in average population firing rates (Pearson's  $r = -0.11$ ,  $df = 29$ ,  $p = 0.56$ ,  
204 Pearson's  $r = 0.32$ ,  $df = 46$ ,  $p < 0.05$ ; Fig. S2I,J). Notably, however, the number of elevated  
205 neurons did not go to zero even at 1.2 mm from the stimulation site: only the relative numbers of

206 elevated and suppressed neurons changed. This suggests that the salt-and-pepper organization  
 207 we saw with imaging persists across the cortex.

208

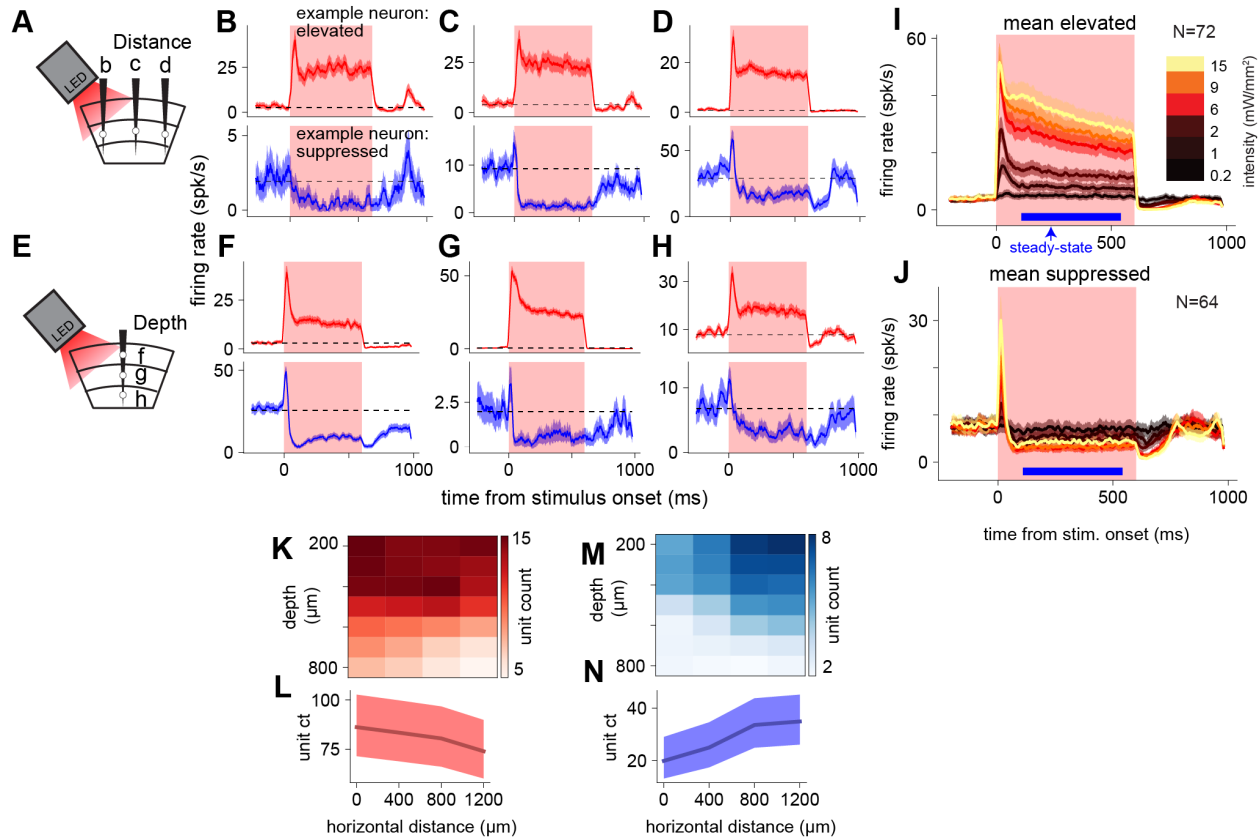

209

210 **Figure 3: Stimulation of V1 excitatory neurons yields salt-and-pepper organization across the cortex. (A)**  
 211 Neural responses recorded across the cortex. Recordings in vivo from awake mice. **(B, C, D)** Example neurons at  
 212 three distances from stimulation light (0  $\mu\text{m}$ , 400  $\mu\text{m}$ , 1200  $\mu\text{m}$ ), showing elevated and suppressed cells at all  
 213 distances. **(E)** Neural responses recorded through cortical depth. **(F, G, H)** Example neurons recorded at three  
 214 depths (250  $\mu\text{m}$ , 550  $\mu\text{m}$ , and 800  $\mu\text{m}$ ), showing elevated and suppressed cells at different depths. **(I)** Population  
 215 average timecourses of elevated cells. Blue bar: interval for steady-state rate calculation. Shaded regions: SEM  
 216 across cells. **(J)** Population time courses of suppressed cells, same conventions as **(I)**. **(K)** Counts of elevated units  
 217 (single and multi-units) by distance and depth, smoothed with a Gaussian kernel for display. **(L)** Distribution of  
 218 elevated steady-state responses across horizontal distance, summed across depth. Shaded region: Wilson score  
 219 95% CIs. Note lower limit of y-axis not zero. **(M-N)** Same as **(K-L)**, but for units with suppressed steady-state  
 220 responses. See also Fig. S2.

221

222 The trends over distance we saw with physiology, however, give only a partial view into how  
 223 population responses varied with distance from the stimulation site. To measure the extent of  
 224 suppression across the cortex, we turned to widefield, mesoscale calcium imaging. For these  
 225 experiments, we expressed GCaMP in all excitatory cells using a genetic mouse line (to  
 226 maximize consistency of GCaMP expression across cortical distance; Fig. 4A; Ai148::Cux2-



227 CreERT2, or Ai162::Cux2-CreERT2, see Methods). We restricted expression of stChrimsonR to  
 228 excitatory cells using the CamKIIa promoter (AAV-CamKIIa-stChrimsonR) and stimulated while  
 229 simultaneously imaging responses.

230 We saw clear spatial patterns in widefield imaging, broadly consistent with the spatial trends we  
 231 saw in the electrophysiology data. During the initial frame of stimulation (~7 Hz imaging, 140 ms  
 232 frame period), we saw an increase in activity both at the center of the stimulation light and  
 233 extending some distance outside the center of expression (Fig. 4B,E,H).

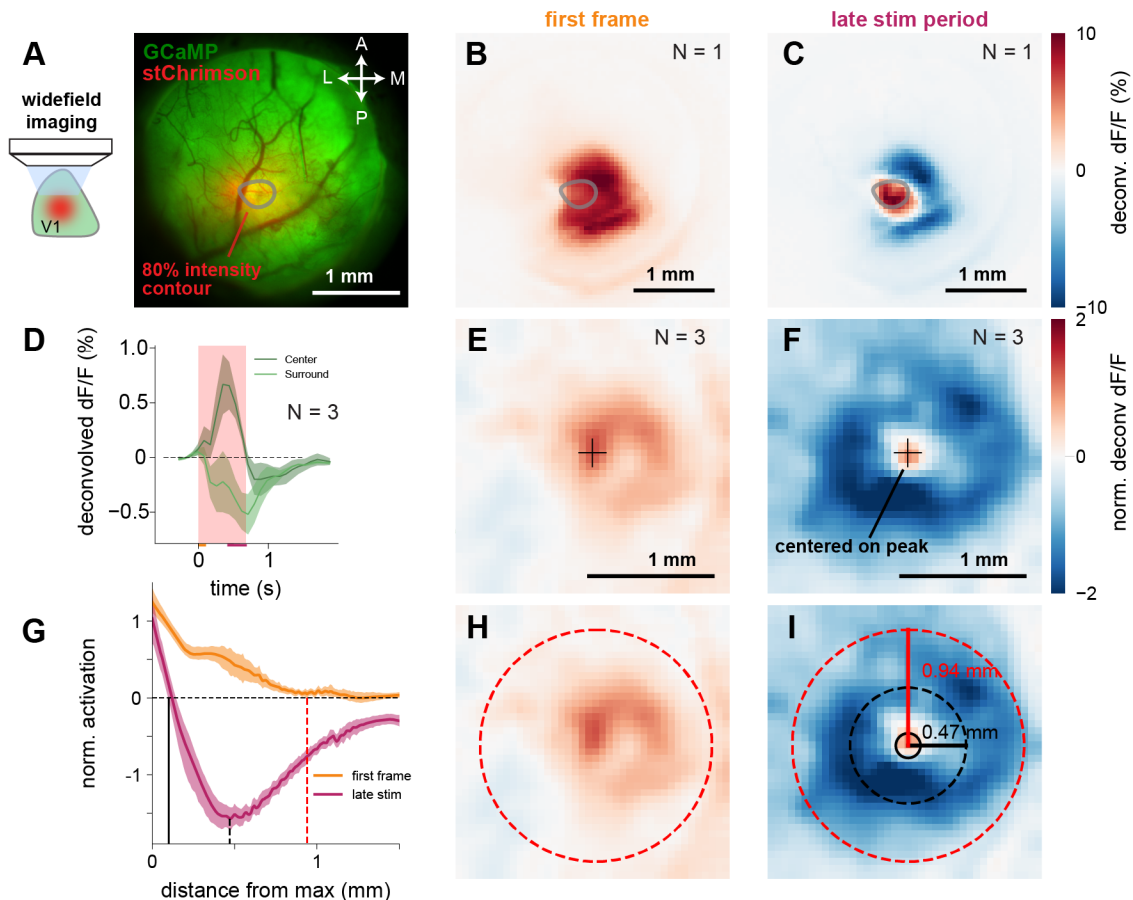

234

235 **Figure 4: Widefield imaging of excitatory neurons shows average center-surround organization during**  
 236 **steady-state periods. (A)** Experimental setup: stChrimsonR in excitatory neurons via viral transfection (AAV-  
 237 CamKIIa-stChrimsonR), expression of GCaMP via mouse line (either Ai148::Cux2-creERT2, GCaMP6f, or  
 238 Ai162::Cux2-creERT2, GCaMP6s; induced with tamoxifen as adult; Methods). Right: imaging field of view for one  
 239 animal. **(B-C)** Mean deconvolved response (see Fig. S3) during first frame (B) and during the late stimulation period  
 240 (C) in an example animal (Fiber for light delivery slightly obstructs the imaging field, see Fig. S4D-F). **(D)**  
 241 Average response to stimulation over time (N = 3). Red shaded region: stimulation period, orange bar: first frame, maroon bar:  
 242 late stimulation (steady-state) time period. **(E,F)** Average responses, N = 3 animals. Responses for each animal were  
 243 aligned spatially to the peak during the late stimulation period (Methods), smoothed for visualization. **(G)** Response  
 244 as a function of distance, averaged from data in E, F. Smoothing: LOWESS. Shaded regions: bootstrapped 95% CIs.  
 245 Vertical lines: zero crossings and inflection points. Zero crossings defined by shortest distance at which 95% CI  
 246 included zero. Black lines: late stimulation period. Solid black: first zero crossing, dotted black: local minimum. Red  
 247 dashed line: early response, first zero crossing. **(H, I)** Same as (E,F) but with superimposed circles whose radii  
 248 correspond to lines in (G). See also Figs. S3-4.

249 A center-surround pattern emerged later in the stimulation pulse (Fig. 4C,F,I) consistent with the  
250 large-scale patterns in the electrophysiological recordings. The area with maximum  
251 stChrimsonR expression continued to show an elevated response, while a donut-shaped region  
252 around it was suppressed (see Fig. S4G-I for spatiotemporal response). The activated area in  
253 the center reflected the area of expression, measured with fluorescence imaging of the cortical  
254 surface (Fig. S4A-F). To examine these timecourses (Fig. 4D), we deconvolved imaging  
255 responses to yield approximations to spike rate changes. We compared several different  
256 deconvolution methods and found suppression in all cases (Fig. S3). The suppression was  
257 strongest about 500  $\mu\text{m}$  from the center of our laser stimulus, and extended over 1 mm from the  
258 stimulation center (Fig. 4 G–I). In electrophysiology, the number of suppressed cells increases  
259 by a factor of two over approximately this distance (Fig. 3K-N), and therefore the increased  
260 number of suppressed individual neurons may be the substrate for the suppression in this  
261 imaging data.

262 In summary, the physiology and imaging data together support the idea that suppressed and  
263 elevated neurons are locally organized in a salt-and-pepper pattern, and that the proportion of  
264 suppressed to elevated neurons increases with distance from the stimulation site. This change  
265 in the proportion of suppressed cells results in a center-surround pattern that can be seen with  
266 population-level imaging, with net suppression in excitatory cells emerging, after an initial  
267 positive transient, about 500  $\mu\text{m}$  away from the stimulation site.

### 268 ***Response dynamics support a balanced-state excitatory-inhibitory network that is*** 269 ***driven to a new steady state by input***

270 If suppression is due to local recurrent network effects, we would expect excitatory cells to be  
271 recruited first by stimulation, and then inhibitory cells should receive inputs from excitatory cells  
272 and respond slightly later. After this first few milliseconds, balanced-state models predict that  
273 excitatory and inhibitory cells should later show similar response distributions<sup>10,11,32,33</sup>. This is in  
274 contrast to weakly-coupled models, or a feedforward inhibition framework, where excitatory and  
275 inhibitory populations change firing rates in opposite directions: that is, input drives inhibitory  
276 cells to increase their rates, inhibiting excitatory cells, which then decrease their rates.

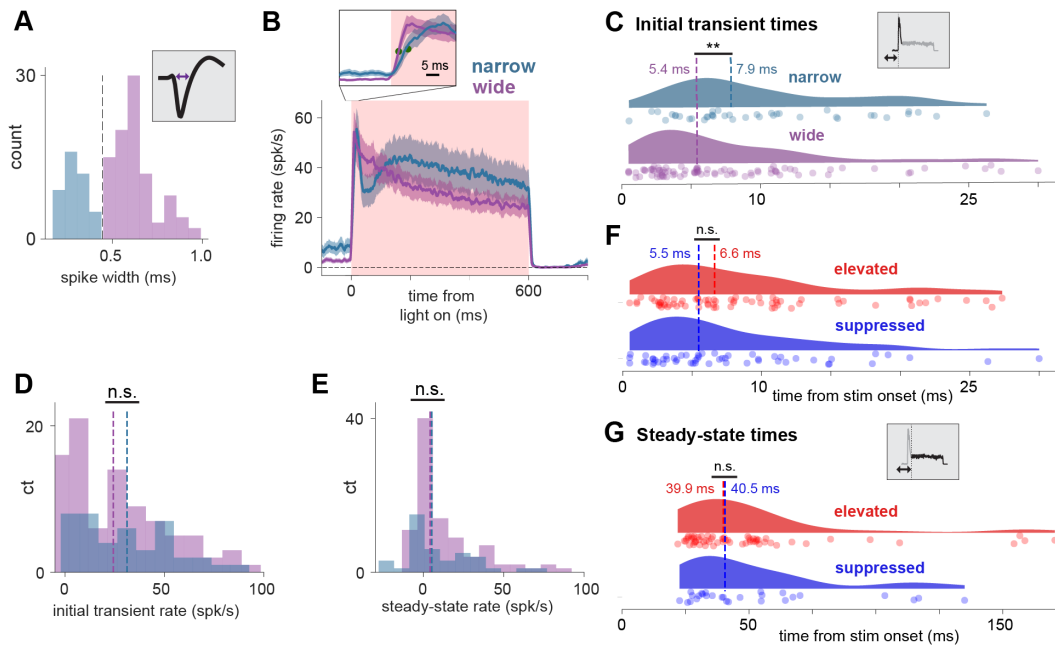

277

278 **Figure 5: Response dynamics are consistent with steady-state suppression shaped by a recurrent network**  
 279 **mechanism.** Wide-waveform (excitatory) units have slightly earlier onset latencies than narrow (inhibitory) units, but  
 280 other quantities do not differ across neural populations. **(A)** Wide/narrow sorting approach. Bimodal widths  
 281 (classification threshold: 0.445 ms). **(B)** Average traces for narrow- and wide-waveform units (Methods). Inset:  
 282 enlarged view of laser onset, highlighting latency difference between narrow and wide units. Green markers: time to  
 283 half peak. **(C)** Onset latencies slightly shorter for wide-waveform units. **(D)** Peak firing rate does not differ between  
 284 wide and narrow units (medians, wide: 24.5 spk/s, narrow: 31.2 spk/s). **(E)** Steady-state firing rate does not differ  
 285 (medians, wide: 4.0 spk/s, narrow: 5.1 spk/s). **(F)** Onset latencies do not differ for elevated and suppressed  
 286 populations. Conventions as in C. **(G)** Time to steady state does not differ for elevated and suppressed populations.  
 287 See also Fig. S5.

288

289 Our data supports the balanced-state recurrent model (Fig. 5A) — we saw differences in  
 290 excitatory and inhibitory responses in the first few milliseconds, but at later times distributions of  
 291 excitatory and inhibitory rates were similar.

292 We classified cells into putative excitatory and inhibitory classes by waveform (Fig. 5A). We  
 293 have previously confirmed<sup>13</sup> with *in vivo* pharmacology that narrow-waveform cells are inhibitory  
 294 interneurons, likely PV-positive fast-spiking cells, while wide-waveform cells are primarily  
 295 excitatory neurons. We saw here that wide-waveform (largely excitatory) neurons have a slightly  
 296 faster onset latency than narrow-waveform inhibitory cells, faster by approximately 2.5 ms (Fig.  
 297 5B, inset, 5C; narrow latency 7.9 ms, wide latency 5.4 ms, difference 2.5 ms, Mann-Whitney U =  
 298 1256.0,  $p < 0.01$ ; onset latencies computed via curve-fitting to rising phases, see Fig. S5A for  
 299 details).

300 If subgroups of excitatory and inhibitory cells composed the suppressed and elevated  
 301 populations, we might expect to see differences in the dynamics of elevated and suppressed

302 cells. But we found no significant differences in onset time or time to steady state for elevated  
303 and suppressed neurons (Fig. 5F,G, onset time Mann-Whitney U = 1741.0,  $p = 0.17$ , time to  
304 steady state, Mann-Whitney U = 801.0,  $p = 0.32$ ). This was also true when restricting the  
305 analysis to only wide-waveform cells (Fig. S5C,D). Another possibility could have been that the  
306 neurons with suppressed steady-state responses were cells that did not express opsin. But the  
307 similar onset latencies of the elevated and suppressed cells (Fig. 5F) excludes that possibility,  
308 and provides further support to the idea that instead a balanced-state recurrent network  
309 explains the suppression.

310 Beyond the differences in onset latency, we found other response dynamics were not different  
311 between excitatory and inhibitory cells. Consistent with a recurrent network with strongly  
312 coupled excitation and inhibition, we found that both excitatory and inhibitory cell populations  
313 increase their average firing rate when excitatory cells are stimulated (wide mean  $\Delta$ : 14.54  
314 spk/s,  $t = 5.52$ ,  $df = 93$ ,  $p < 0.001$ , narrow mean  $\Delta$ : 13.53 spk/s,  $t = 3.07$ ,  $df = 41$ ,  $p < 0.01$ ). That  
315 is, both excitatory and inhibitory populations contain elevated and suppressed neurons, though  
316 elevated cells dominate both averages (Fig. 5E). Further, the initial transient and steady-state  
317 firing rate medians were not detectably different between inhibitory and excitatory cells  
318 (transient: Mann-Whitney U = 1816.0,  $p = 0.23$ , steady-state Mann-Whitney U = 1866.0,  $p =$   
319 0.31, Fig. 5D,E). Also, time to steady state for wide-waveform and narrow-waveform cells did  
320 not differ (Fig. S5B), consistent with the idea that the steady-state dynamics emerge from  
321 integration of both inhibitory and excitatory inputs. Overall, the response distribution and  
322 dynamics we observed in inhibitory and excitatory cells are consistent with a strongly-coupled  
323 recurrent network.

### 324 ***A neuron's response is only weakly predicted by optogenetic input to that neuron***

325 We used the imaging data to determine if the suppression we observed was explained by  
326 variation across cells in optogenetic drive. We found that while indeed there was variability in  
327 different cells' responses, there was very little relationship between opsin expression and cells'  
328 firing rate changes. To estimate the optogenetic drive to individual neurons, we measured  
329 fluorescence of mRuby2 (fused to stChrimsonR) in donut-shaped regions around each cell's  
330 membrane using two-photon imaging (Fig. 6, Fig. S6). The measured *in vivo* distribution of  
331 opsin expression was well-fit by a lognormal distribution after excluding the 16.8% (Wilson score  
332 95% confidence interval: [12.7%, 22.1%]) of cells with low fluorescence (Fig. 6C, see Methods).  
333 The *in vivo* estimate of the percentage of non-expressing cells was lower than what we  
334 observed with histology, perhaps because we selected FOVs with dense opsin for *in vivo*  
335 imaging. At the same time, however, our *in vivo* observations are consistent with past work that  
336 finds that AAV transfects adult neurons in a non-uniform way, finding substantial variability in  
337 opsin expression from cell to cell<sup>13,31</sup>.

338 We found that the amount of opsin-related fluorescence explained little of the variance in  
339 steady-state responses (Fig. 6A-D, Pearson's  $r = 0.21$ ,  $df = 106$ ,  $p < 0.05$ , high fluorescence  
340 neurons excluded [ $> 0.5$ ]; Fig. 6D-E, population: at 1 mW: Pearson's  $r = 0.18$ ,  $df = 219$ ,  $p <$   
341 0.01, at 2 mW: Pearson's  $r = 0.17$ ,  $df = 219$ ,  $p < 0.01$ ).

342 This striking decoupling effect — that the amount of opsin input barely predicts how cells' firing  
 343 rates are modulated by stimulation — suggests that a given cell's response may not be dictated  
 344 by input to that cell, but instead by recurrent inputs.

345 Notably, both high-expressing cells and low-expressing cells showed little relationship between  
 346 opsin expression and response (Fig. 6E, red and gray lines). This supports the idea that the  
 347 decoupling is not due to cell-autonomous intrinsic properties but indeed due to recurrent  
 348 network inputs. To further test this, we measured the variability of neural responses as a  
 349 function of stimulation intensity. If a neuron's response were in fact controlled primarily by its  
 350 opsin expression (the optogenetic input to that neuron) and not network input, increasing the  
 351 input intensity should keep the variance in response the same, or reduce it, because the fixed  
 352 opsin level is the principal source of response drive (Fig. S2K). Or, if response was dictated by  
 353 opsin level, increasing intensity might produce a bimodal response distribution as the  
 354 optogenetically-driven neurons separate from non-expressing neurons (Fig. S2L). We found  
 355 support for none of these possibilities. Instead, the response pattern increased in variance as  
 356 stimulation grew stronger (Fig. S2M-O), supporting the idea that it was network input, not opsin  
 357 level, that controlled cells' responses.

358 We next turned to simulations, fit to our data and building on the recent theoretical advances of  
 359 Sanzeni et al. (in press), to more completely characterize recurrent network influences on  
 360 neurons' responses.

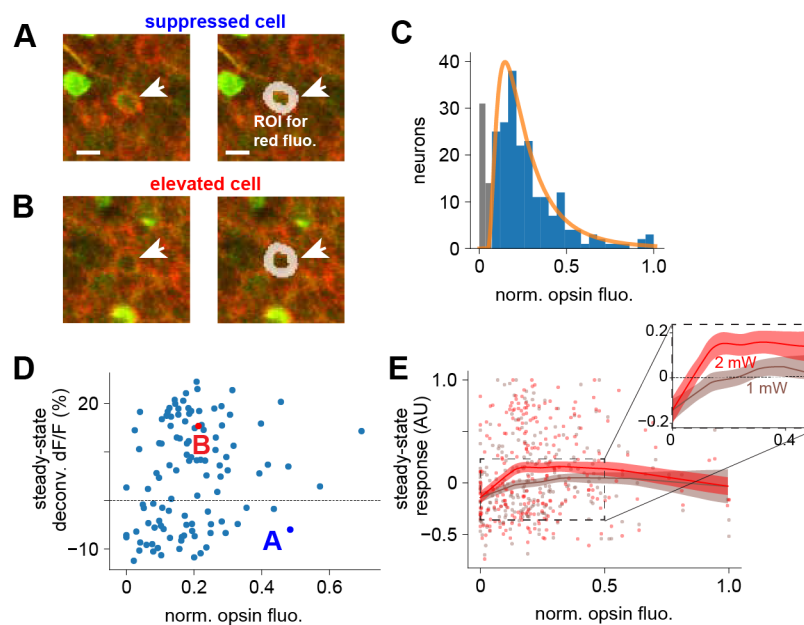

361  
 362 **Figure 6: stChrimsonR expression only weakly predicts 2-photon steady-state response. (A)** Left: Red  
 363 (stChrimsonR-mRuby2) and green (GCaMP7s) fluorescence of an example cell with a suppressed steady-state  
 364 response during optogenetic stimulation. Right: donut-shaped region of interest (ROI), inner and outer boundary  
 365 calculated by shrinking or expanding the cell border (CalMan, Methods) **(B)** Same as (A), except for an example cell  
 366 that shows an elevated steady-state response. The suppressed cell shows brighter red fluorescence than the  
 367 elevated cell, quantified in D. **(C)** Distribution of opsin fluorescence intensity (N=3 animals). Orange: Lognormal fit,  
 368 excluding non-expressing cells (gray; see Fig. S6). **(D)** Example relationship between opsin expression and  
 369 response; only a weak relationship is seen. x-axis: red fluorescence in donut-shaped ROIs (n = 113 cells, N=1

370 animal; 2 mW stimulation power). Example cells are highlighted (colored markers, letters). **(E)** Population data: same  
371 as D for N=3 animals (N=244 neurons). Two laser intensities, 1 mW (brown), 2 mW (red). Heavy lines: LOWESS fits;  
372 shaded regions: bootstrapped standard error. Slight decline at high values may be due to response saturation or  
373 overexpression of opsin in a few cells. Inset: Zoomed view of area indicated by dashed box, cells with the least opsin  
374 expression show a slightly smaller response on average than other cells. See also Fig. S6.

375 ***Input from the recurrent network dominates responses, as explained by a balanced-***  
376 ***state model***

377 Thus far, a moderately- or strongly-coupled balanced-state network seems consistent with both  
378 the response distributions and dynamics we observe. Indeed, recent theoretical work in rate-  
379 based models<sup>22</sup> has shown that this kind of heterogeneous network response (“reshuffling”)  
380 occurs in strongly-coupled cortical networks. To understand if our experimental data could be  
381 explained by this reshuffling mechanism, we examined recurrent network models with features  
382 reflecting our data, and determined which features of the recurrent network models were  
383 important to explain the suppression.

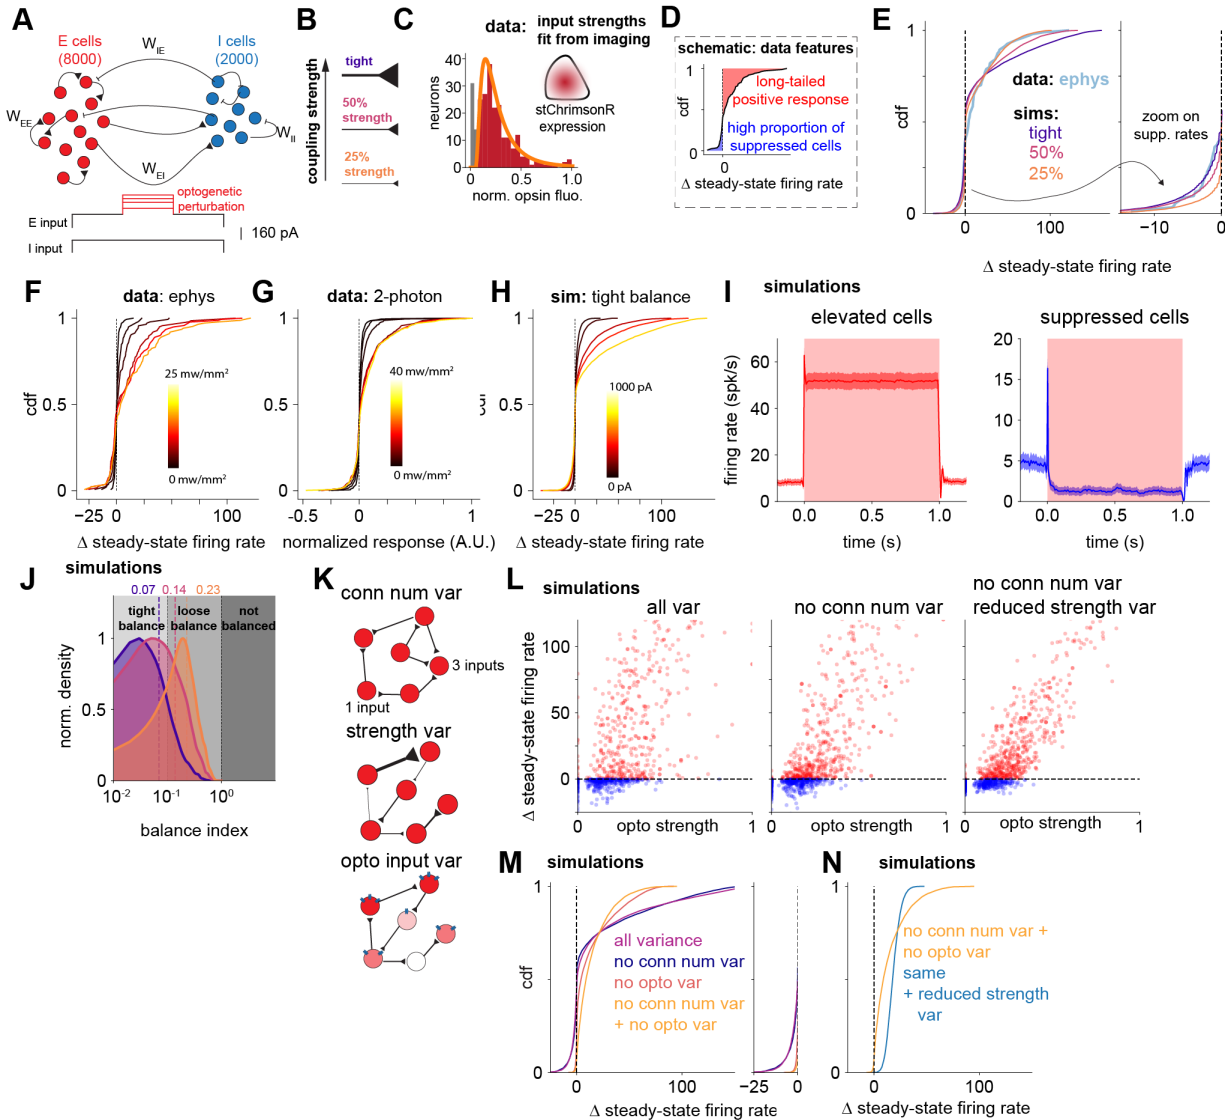

384

385 **Figure 7: Strongly-coupled recurrent neural network model with heterogeneous connectivity describes the**  
 386 **data.** (A,B) Simulation design: (A) conductance-based spiking network model with 8000 excitatory cells and 2000  
 387 inhibitory cells. (B) Network mean recurrent strength is varied to measure effects on neural  
 388 responses. (C) Optogenetic input strengths sampled from a lognormal distribution fit from *in vivo* 2p measurements  
 389 (Fig. 6C). (D) Schematic of data features simulations describe. (E) The tightly-balanced model fits the long tail of  
 390 excitation and the proportion of suppressed neurons. (F-H) Responses to stimulation during (F) electrophysiology,  
 391 (G) 2-photon experiments, and (H) simulations. (I) Left, Mean timecourse, elevated cells, strongest recurrent  
 392 network. Right, same: but for suppressed cells. (J) Balance index (Ahmadian and Miller, 2021) of the 3 networks (B).  
 393 The strongest-coupled network (purple) has a median index in the tight balance regime. (K) Schematic of types of  
 394 input variability. Variation in input can arise from variation across cells in number of recurrent inputs, strength of  
 395 recurrent inputs, or optogenetic input strength. (L) Simulated neural responses to optogenetic input, with (left, same  
 396 as Fig. 7F) and without (center) variability in number of recurrent inputs. Relationship between optogenetic input and  
 397 response strengthens when variance sources are removed ( $R^2$  original = 0.50,  $R^2$  reduced conn. Num. var. = 0.66;  $R^2$   
 398 reduced conn num and reduced strength var. = 0.77) (M) Steady-state firing rate distributions when input variability  
 399 components are removed. Purple: network with parameters as in panels E (tight),H,I,L. Right: Same data, zoom to  
 400 the suppressed portion of the distribution. Some suppression exists if either source of variance is removed, but

401 suppression nearly abolished when both sources of variance are removed. **(N)** Finally, reducing variance in synaptic  
402 weights (by a factor of 10) nearly removes response variability and suppression. See also Figs. S7-8.

403 We simulated conductance-based spiking neural networks, varying network connectivity and  
404 opsin drive across neurons in these models, and measured network responses to excitatory cell  
405 stimulation (Fig. 7A,B).

406 Each simulation consisted of two sparsely connected populations of conductance-based spiking  
407 neurons, one excitatory (80%) and one inhibitory population (20%). For each set of network  
408 parameters, we adjusted a background input current to either excitatory or inhibitory neurons to  
409 hold the spontaneous firing rate of the neurons at a value (~5.4 spk/s) consistent with the data  
410 (Fig. S8F). We drew the opsin input strength for each neuron from a distribution fit to the  
411 imaging data, and scaled that distribution until the 75<sup>th</sup> percentile of the network response  
412 matched the electrophysiology data (lognormal distribution, with 16.8% nonexpressing, Fig. 7C).  
413 We also ran these simulations using the percentage of nonexpressing neurons as estimated  
414 from the histology data (41%) and found no qualitative differences (Fig. S8I-M).

415 We first manipulated the mean connectivity strength of recurrent connections. We constructed  
416 three different models, varying the average strength of recurrent coupling in each (schematic,  
417 Fig. 7B). The “tightly balanced” network had the strongest recurrent coupling, and we scaled  
418 down the synaptic weights by a factor of 2 or 4 to create more weakly-coupled “50%” and “25%  
419 strength” network simulations. We confirmed that each of these simulations showed paradoxical  
420 suppression of inhibitory cells, a sign of strong recurrent coupling within the excitatory network  
421 and the ISN regime, as observed in visual cortex<sup>11,13,34</sup>. We stimulated the inhibitory cells in  
422 each network and found, as expected, paradoxical suppression (Fig. S7A,B).

423 Recurrent excitatory-inhibitory networks can be tightly or loosely balanced<sup>10</sup>, depending on the  
424 total amount of recurrent excitatory and inhibitory input to network neurons. To classify the  
425 networks, we calculated the balance index, a ratio that measures how completely inhibitory  
426 input cancels out the excitatory input for each neuron in the networks<sup>10</sup> (see Methods). We  
427 found that all three networks we constructed are balanced, as expected due to their irregular  
428 spontaneous activity (balance index  $\ll 1$ ), and the networks span a range from loose to tight  
429 balance (Fig. 7J).

### 430 ***The model replicates the long tail of positive responses, suppressed responses,*** 431 ***and dynamics***

432 Two characteristic features of the response data we observed are the long-tailed positive  
433 response and the substantial proportion of suppressed cells (Fig. 7D). All three simulated  
434 networks showed a long tail of elevated responses as in the data, with many neurons showing  
435 increases in firing rate to stimulation, and a few showing large increases (Fig. 7H). However, the  
436 amount of suppression depended on recurrent coupling strength. Increasing the total excitatory  
437 and inhibitory recurrent input by varying the mean coupling strength leads to more suppressed  
438 neurons when other network parameters are held constant (Fig. 7E). The network that best fit  
439 the fraction of suppressed cells we observed was the most strongly-coupled network, which was  
440 just inside the tight balance regime (Fig. 7E,J; suppression sensitivity to baseline rate and



441 coupling strength characterized in Fig. S8F-H). Additional model components could lead to  
442 similar results with networks of higher or lower balance index estimates. For instance, adding  
443 structured connectivity may reduce the required coupling strength<sup>22</sup>. However, our data  
444 underline that the recurrent coupling should be strong enough so that when input arrives to a  
445 population of neurons, many neurons' responses are substantially controlled by their recurrent  
446 input.

447 Excitatory and inhibitory cells' response distributions were similar in the model, as also seen as  
448 in the data (Fig. S7E,F).

449 Finally, to further demonstrate how well the model could reproduce the features of the observed  
450 response distributions, we simulated responses while parametrically increasing the strength of  
451 the input, and compared the results to the electrophysiological and 2-photon responses to  
452 increasingly strong experimental optogenetic stimulation. The shapes of the response  
453 distributions in the most tightly coupled model and the data were similar (Fig. 7F-H).

454 Given the ability of a balanced-state model to describe the suppression, we checked if the  
455 model dynamics were consistent with the data. We found that model responses were  
456 qualitatively similar (Fig. 7I) to the timecourses of responses seen in the data (Figs. 2-3).  
457 Excitatory cells first showed a brief, positive transient response before the network settled into a  
458 new steady state, with some cells excited and some suppressed. The initial positive transient in  
459 suppressed cells is a key observation, as it suggests a network mechanism where input initially  
460 excites many excitatory neurons, but later recurrent inputs lead to suppression in many of the  
461 same neurons. A second similar feature of the dynamics in model and data is the offset  
462 dynamics in both elevated and suppressed cells: after stimulation ends, both show a slight  
463 suppression before returning to baseline. Finally, excitatory cells have earlier onset times,  
464 indicating that E cells were directly stimulated and I cells were recruited just a few milliseconds  
465 later (Fig. S7D), before both populations then evolved to a new steady state.

466 One feature of the dynamics seen in the data but not the model is that for high stimulation  
467 powers there is a slight decay during the tonic or steady-state period (Fig. 3I). However, this  
468 decay effect is not seen at lower stimulation intensities, suggesting it arises from known opsin  
469 dynamics (inactivation at high light power, e.g.<sup>35</sup>) or other known biophysical, non-network,  
470 effects like spike-rate adaptation.

471 In sum, this model recapitulates many of the features of our observations, suggesting that a  
472 excitatory-inhibitory mechanism with strong and variable recurrent coupling explains how V1  
473 neurons respond to input.

474 ***Variability in recurrent input creates different responses in different cells, and***  
475 ***explains the decoupling of a neuron's response from its optogenetic input***

476 In our data, we saw strikingly little correlation between opsin expression and neural response to  
477 stimulation (Fig. 6), suggesting recurrent input strongly governs the response. In fact, the tightly-  
478 coupled model showed the same pattern of responses (Fig. 7L, left).

479 We therefore asked which sources of variability were important to explain why neural responses  
480 were weakly related to optogenetic input. To do this we varied sources of input variability in the  
481 model (Fig. 7K). First, we reduced variability in either the number or strength of recurrent inputs  
482 and found that this created a stronger correlation between optogenetic input strength and  
483 response (Fig. 7L, middle and right) which made the model a worse fit for the data (Fig. 6). The  
484 original relationship was not recovered by increasing the recurrent strength of the network (Fig.  
485 7 Supp 3), implying recurrent connection variability was required to produce this effect and  
486 higher recurrent strength could not substitute for it. Next, we asked whether variability in opsin  
487 input across cells was also essential to explain the suppression we observed. Removing the  
488 variance in optogenetic input across cells (so that each excitatory cell with opsin received the  
489 same input) significantly reduced the number of suppressed neurons and also produced a  
490 worse fit to the data (Fig. 7M; right inset highlights suppressed neurons).

491 If input variability was the primary source of variability in neural responses, then removing  
492 variability from both kinds of input — both optogenetic input variability and recurrent input  
493 variability — should substantially reduce the amount of suppression observed. This is what we  
494 found. Removing or reducing both types of variability produced a set of neural responses  
495 clustered tightly around the mean response (Fig. 7N) with no suppressed neurons. Thus, both  
496 variability in recurrent input and in optogenetic input are required to explain the data.

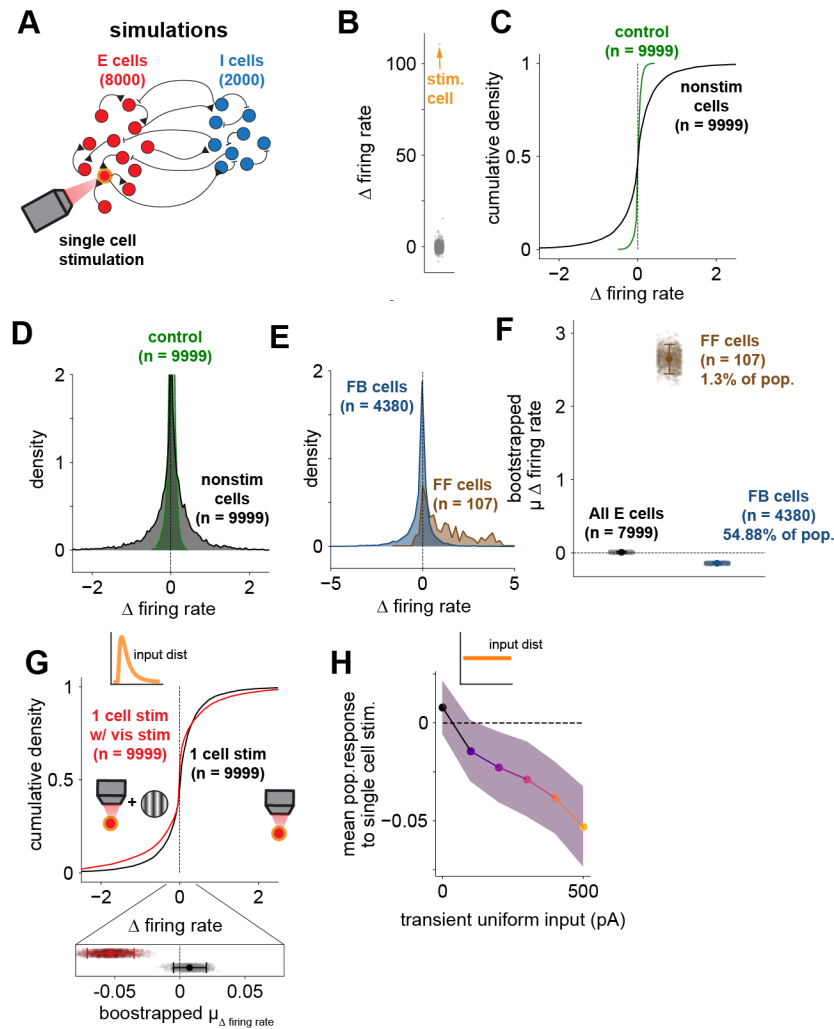

497

498 **Figure 8: Single cell stimulation produces elevated firing rates in a small subset of cells, but widespread**  
 499 **weak suppression across the population. (A)** Simulation schematic: one cell stimulated ('tight' network, Fig.  
 500 7B,E,H). **(B)** Single cell stimulation weakly modulates other cells. **(C)** Single cell stimulation reshuffles the distribution  
 501 of responses; individual neurons change response (black, note variance of distribution), mean/median remain near  
 502 zero. **(D)** Densities, same data as (C). **(E)** Defining cells by their connectivity to/from the stimulated cell (direct input  
 503 from stimulated cell, FF, brown; input from an inhibitory cell receiving FF input, blue) reveals a small number of  
 504 excited cells. N=1 instantiation of network (weight choice). **(F)** Means of E across many instantiations. Black: full  
 505 population of E cells, Brown, blue: same conventions as E. Error bars: SEM. **(G)** Simulated visual input during  
 506 stimulation leads to mean suppression. Red: lognormally distributed input + single cell stimulation, black: single cell  
 507 stimulation alone. Red mean is negative. **(H)** Mean suppression increases with stronger input.

508

509 Together these results show that both optogenetic input variability and recurrent connection  
 510 variability help create the variability in different neurons' responses. Each neuron's firing rate is  
 511 affected not just by the optogenetic input that particular cell receives, but also by recurrent input  
 512 received from other neurons, and the other neurons themselves receive different amounts of  
 513 optogenetic and recurrent input. When optogenetic input is delivered, the whole network  
 514 changes state to a new set of firing rates, and each neuron's new firing rates are only weakly

515 related to the optogenetic input to that neuron. Thus, the recurrent network explains the  
516 unexpected decoupling of optogenetic input strength from neural response strength that we  
517 observed experimentally (Fig. 6).

518 ***A balanced-state network model with connection variability also explains expected***  
519 ***responses to single cell stimulation***

520 Past work has found that stimulating a single cell in visual cortex leads to mean suppression in  
521 the surrounding population<sup>20</sup> Our results seem initially to contradict this finding, because our  
522 data and simulations both find a net positive response across the population when we stimulate  
523 many excitatory cells.

524 To determine if the effects of single-cell stimulation could also be explained by the balanced-  
525 state simulation that describes our data, we performed simulations of single cell stimulation in  
526 the same tightly-coupled network (Fig. 7A,B), measuring the response of the non-stimulated  
527 population (Fig 8A,B). We found that, while single cell stimulation produced a range of individual  
528 cell responses (i.e. reshuffling, Fig. 8C), the mean response was not negative, but instead close  
529 to zero (Fig. 8C,D; mean firing rate 95% CI [-0.006, 0.021], t (9998) for nonzero mean = 1.13, p  
530 = 0.26). The excitatory cells that received a direct connection from the stimulated cell  
531 (feedforward, FF, cells, n=107 neurons) had an elevated response. Those that received a  
532 connection from the inhibitory cells which received a monosynaptic input from the directly  
533 connected E cells had a very slightly suppressed response (i.e. E-I-E connections, or feedback  
534 (FB) cells, n=4380 neurons; Fig. 8E). The small set of strongly excited cells average with the  
535 large number of weakly suppressed cells to lead to a mean response near zero (Fig. 8F,G).

536 Single-cell stimulation in the model we fit, therefore, could not account for the mean suppression  
537 observed in previous studies. We hypothesized that this difference could be due to difference in  
538 the activation state of the network. Chettih and Harvey (2019) stimulated during visual input,  
539 while here we delivered optogenetic input during spontaneous activity. Such effects can be seen  
540 in balanced-state models: Sanzeni et al. (in press) found that increasing the firing rate of a  
541 similar network to our model reduced the mean response of the network. Further, in models of  
542 visual cortex with subnetwork connectivity (e.g. higher connectivity between neurons with similar  
543 orientation tuning<sup>36</sup>, it has also been shown that visual input can shift the network response to  
544 be more negative<sup>37</sup>. Therefore, to test whether additional network drive could reproduce mean  
545 suppressive responses, we simulated single-cell stimulation paired with an input that mimics  
546 visual drive (Fig. 8G; Methods). Indeed, this shifted the mean population response negative  
547 (Fig. 8G; firing rate change: mean: -0.05; 95% CI: [-0.07, -0.04]). This effect is quantitatively  
548 dependent on the strength of the simulated visual input: as simulated visual input grows  
549 stronger, the more negative the mean response to optogenetic input becomes (Fig. 8H).

550 Thus, a strongly-coupled balanced state model is consistent with not just our data, but with past  
551 results on single-cell stimulation. Strong mean connectivity, as well as variability in recurrent  
552 connectivity, shape the responses of the network.

## 553 Discussion

554 We found robust suppression in visual cortex in response to direct optogenetic drive to  
555 excitatory neurons, with intermixed elevated and suppressed neurons. This salt-and-pepper  
556 distribution of responses resembles what is observed during visual input, and arises without  
557 input to inhibitory neurons. The firing rate distributions and response dynamics suggest a  
558 network mechanism for the observed suppression: that recurrent input variability, combined with  
559 external input variability, decouples the optogenetic input strength from the firing rate response  
560 in individual cells. This yields a weak correlation between input and response (Fig. 6E), so that a  
561 high level of opsin in a cell does not necessarily mean that cell fires strongly in response to  
562 stimulation. This recurrent network mechanism seems likely to create variability in visual  
563 responses as well (Fig. 1), because these recurrent connections are present in the cortical  
564 network for all kinds of input, and so shape responses to visual input also.

565 Intuitively, the network mechanism that creates the salt-and-pepper excitation and suppression  
566 is that external inputs first elevate the firing rates of excitatory cells (Fig. 5A-C), some more than  
567 others. That activation excites inhibitory cells, also some more than others. The result is the  
568 network settles into a new steady state (Fig. 5E-G) with a very broad distribution of excitatory  
569 cell firing rate changes (Figs. 6,7). Our measurements, showing a long tail of excited responses  
570 (Fig. 2I), a substantial number of suppressed cells, and response dynamics with initial transients  
571 followed by steady-state excitation and suppression (Fig. 3I,J), all confirm that recurrent inputs  
572 can explain the response patterns we see.

573 The salt-and-pepper pattern of responses varies gradually over space, with suppressed cells  
574 becoming a larger proportion of neurons with distance from the stimulation site (Fig. 3,4). The  
575 salt-and-pepper distribution of responses we observe is therefore overlaid on top of the global  
576 trends we observed in widefield imaging. This global suppression, in a concentric surround  
577 region similar to surround suppression during vision (e.g.<sup>38</sup>), is driven by direct excitatory inputs,  
578 suggesting that visual surround suppression is not inherited from other regions but also arises  
579 from recurrent interactions.

### 580 The role of inhibition and suppression in the cortex: sharpening or high-dimensional 581 pattern modification?

582 In principle, one role of suppression in the cortex could be to sharpen responses to input via  
583 attenuating responses in non-driven cells. The finding of distance-dependent suppression in our  
584 widefield data (Fig. 4) implies exactly this conclusion. Pioneering work using single-cell  
585 stimulation<sup>20</sup> also found the same sort of suppression in non-stimulated neurons. They showed  
586 that suppression falls off with distance by averaging across recorded neurons. (Note that this is  
587 true across tuning properties: while like-tuned cells in Chettih and Harvey (2019) show less  
588 suppression than other neurons, the average effect in like-tuned cells is still suppression.)

589 Our data and model extend this to show that sharpening is not the only, or likely even the  
590 primary, effect of cortical suppression. Using individual cells' responses with 2p imaging and  
591 electrophysiology combined with simulations, we demonstrate that cortical stimulation generates  
592 large response variability even in cells directly receiving input. That statement has significant

593 consequences for how the cortex transforms its input — it is not just that recurrent connectivity  
594 sharpens responses, but it can create much more complex and high-dimensional  
595 transformations<sup>21</sup>. Such transformations are central to neural coding and how neural codes are  
596 created from input.

### 597 **Variability in recurrent connectivity in the cortex: experimental evidence**

598 We find that variability in connection strength between L2/3 excitatory neurons is necessary to  
599 create the heterogeneous responses to input we, and others<sup>39</sup>, observe. Several observations  
600 suggest that the brain has recurrent variability at least as large, and possibly larger, than we use  
601 in the simulations. First, electrophysiological studies often find a long tail of synaptic strengths  
602 between pairs of neurons, with a few very large connections<sup>40–42</sup>. The variance of individual  
603 synaptic weights may be lower<sup>43</sup>, with the larger connection strengths due to multiple synaptic  
604 contacts between neurons (though see<sup>44</sup> for evidence of long-tailed synaptic bouton sizes.) If  
605 there is a long tail in synaptic connection strengths, this would still support our finding of high  
606 recurrent variance, as it would increase the recurrent variability even beyond the weight  
607 distributions we used, which are truncated Gaussians with mean and variance equal. Second,  
608 we used a connection sparsity of 2%. We set the number of inputs a cell received from the  
609 recurrent network according to a binomial sum, with fixed connection probability between  
610 neurons. Connection probability in the brain may be higher, as for example paired recording  
611 studies have found connection probabilities of 10% or higher<sup>41,42</sup>. And higher connection  
612 probability will produce greater variance in net input into different cells, as binomially-distributed  
613 sums have a larger variance as connection probability increases (in the 0–50% range). Finally,  
614 patterned or subnetwork-specific connections, which we did not include, would also only  
615 increase variance, though specific connections seem to have just a moderate effect on  
616 connection probability — shared tuning changes the connection probability from 10–20% on  
617 average to 30–50% for like-tuned neurons, in some cases<sup>36</sup>. Taken together, the substantial  
618 recurrent variability that explains our data is consistent with experimental measurements of  
619 recurrent connection variability.

### 620 **Strong balance, loose balance: implications for models that describe cortical networks**

621 We find that a two-population excitatory-inhibitory model is sufficient to explain the data we  
622 observe. *A priori*, it could have been that a model with multiple inhibitory subtypes<sup>15,45</sup> would be  
623 needed to reproduce the dynamics and population statistics we saw. Recent work has argued  
624 for particular roles for cortical inhibitory subtypes: that parvalbumin-positive (PV) neurons are  
625 the primary class providing inhibition stabilization<sup>13,46</sup>, while somatostatin-positive (SOM) cells  
626 are involved in gain control<sup>46</sup>. These separate roles are still consistent with our findings. PV cells  
627 are likely to be the primary inhibitory cell class in our data and model, as PV cells are the  
628 narrow-waveform cells that we identify in electrophysiology<sup>13</sup> (see Fig. 5). Those cells show  
629 dynamic and response firing rate changes expected for the inhibitory population in an E-I model  
630 (slightly delayed onset latency, similar distribution of firing rate change as E cells). It is also  
631 plausible that stimulating cortical excitatory cells as we did does not cause gain to vary, so that  
632 a separate gain role of SOM neurons was not evident in our experiments. Thus, a two-  
633 population inhibitory model (with PV cells likely making up a large part of the I population in the  
634 model) is sufficient to explain our data.

635 In addition to supporting the idea that recurrent connections between neurons have substantial  
636 variability, our results also confirm that the mean V1 recurrent connectivity is strong — i.e. V1  
637 operates as an inhibitory-stabilized network, meaning that the excitatory network is unstable if  
638 inhibition could be frozen<sup>11,13,14,22</sup>. Within the class of balanced networks, two sorts of balance  
639 have been distinguished: “loose” and “tight” balance<sup>10</sup>. The best network in our results (Fig. 7) is  
640 on the border of the tight- and loose-balance regimes, with individual cells falling in either the  
641 tight or loose-balance regimes. A network near the transition from loose to tight balance is  
642 broadly consistent with past experimental data (<sup>22</sup>, reviewed in ref. <sup>10</sup>) which do not suggest a  
643 very tightly-balanced regime for the cortex (Fig. 7). Recent work has shown that adding  
644 structured (tuned subclass) connectivity allows substantial recurrent effects with looser  
645 balance<sup>22</sup>, further supporting the idea that our data support loose or moderate balance.

646 The mechanism we find for suppression is strikingly different than paradoxical suppression in an  
647 ISN when inhibitory cells are stimulated<sup>12–14</sup>. In both cases, suppression is paradoxical: here we  
648 excite excitatory cells and see suppression of excitatory cells, and in an ISN, exciting inhibitory  
649 cells causes suppression in inhibitory cells. But in paradoxical inhibitory suppression, the *mean*  
650 firing rate of the inhibitory population decreases<sup>14</sup>. Here with excitatory cell stimulation, the  
651 mean firing rate change is non-paradoxical, as excitatory cell average rates *increase*. It is the  
652 substantial variability or heterogeneity of recurrent connections in combination with variability of  
653 input that causes many cells to be suppressed as others increase their firing. However, both  
654 types of paradoxical suppression, when excitatory or inhibitory cells are stimulated, are only  
655 present when the network operates as an ISN – that is, both effects happen in a network with  
656 strong average recurrent coupling<sup>13,22</sup>. The observed paradoxical suppression of excitatory cells,  
657 however, requires variability around that strong average recurrent coupling.

#### 658 **Future: subnetworks, computation, and interactions between areas**

659 These results could be extended in a few ways. First, here we did not consider how subnetwork  
660 connectivity between excitatory neurons in the cortex might influence the effects. Ko and  
661 colleagues (2011) showed approximately a 2–3 fold increase in probability of connection  
662 between V1 excitatory neurons that had similar tuning (orientation or direction) compared to  
663 those with dissimilar tuning. Adding subnetwork connectivity would not qualitatively change our  
664 conclusions: that suppression results from recurrent influences, and that it depends on  
665 variability of connectivity within the network. However, future work stimulating within or across  
666 subnetworks might change the fraction of cells suppressed, given that input patterns would drive  
667 neuron populations with somewhat more or less connectivity with each other and the rest of the  
668 network. Cell-specific two-photon holographic stimulation<sup>16,47–49</sup> seems well-placed to study how  
669 patterned activity in one subnetwork affects activity in another subnetwork.

670 While local collaterals probably contribute the majority of recurrent cortical input, meaning  
671 nearby neurons influence each other via direct synapses, it is possible that long-range, inter-  
672 areal, connections could contribute to the experimental results we observe. Estimates of  
673 connectivity falloff show most connections to a given neuron come from local neurons<sup>6,7</sup>. But in  
674 principle, cells in other areas could form part of the recurrent population. This could happen for  
675 example if projections from V1 to the thalamus recruited neurons there which connect back to  
676 the cortex. However, our widefield imaging data (Fig. 4) shows that the suppression peaks a few

677 hundred microns from the stimulation site, suggesting relatively local influence. Therefore, it  
678 seems likely that the recurrent connections in the simulations primarily reflect local connections  
679 within V1 to nearby neurons.

## 680 **Conclusion**

681 Here we find paradoxical suppression of excitatory cells in the cortex when excitatory cells are  
682 stimulated. These results suggest that a primary purpose of recurrent connectivity in visual  
683 cortex is to change the steady-state firing rate of network neurons, beyond just how inputs are  
684 transformed by feedforward connections. Our results are a step forward in explaining how  
685 cortical networks change their firing in response to different patterns of input — a fundamental  
686 building block of neuronal computation.

## 687 **Acknowledgements**

688 We thank Kaya Matson for help with RNAscope, Aanika Kashyap for histological analysis and  
689 Nicolas Brunel, Alessandro Sanzeni, and Ken Miller for helpful comments on the manuscript  
690 and/or discussion. This work was funded by the National Institutes of Health (BRIN  
691 U01NS108683 and intramural support ZIAMH002956). This work utilized the computational  
692 resources of the NIH HPC Biowulf cluster (<http://hpc.nih.gov>).

## 693 **Author contributions**

694 Electrophysiology data was collected by ZZ. 2-photon data was collected by PKL, AJL, and  
695 JFO. Widefield data was collected by JFO. Histological data collection and analysis was  
696 performed by ZZ and HCG. JFO and MHH designed and implemented simulations. JFO, MHH,  
697 and ZZ curated and analyzed data. JFO and MHH wrote and edited the manuscript.

## 698 **Declaration of interests**

699 The authors declare no competing interests.



## 700 STAR Methods

### 701 *Key resources table*

| Reagent or resource                                  | Source                      | Identifier           | Additional information |
|------------------------------------------------------|-----------------------------|----------------------|------------------------|
| <i>Chemicals, peptides, and recombinant proteins</i> |                             |                      |                        |
| Tamoxifen                                            | Sigma-Aldrich               | T5648-5G             |                        |
| <i>Experimental models: organisms/strains</i>        |                             |                      |                        |
| Ai148                                                | The Jackson Laboratory      | RRID:IMSR_JAX:030328 |                        |
| Ai162                                                | The Jackson Laboratory      | RRID:IMSR_JAX:022731 |                        |
| Cux2-CreERT2                                         | MMRRC                       | RRID:MMRRC_032779-MU |                        |
| Emx1-cre                                             | The Jackson Laboratory      | RRID:IMSR_JAX:005628 |                        |
| <i>Bacterial and virus strains</i>                   |                             |                      |                        |
| AAV9-hSyn-jGCaMP7s-WPRE                              | Addgene                     | RRID:Addgene_104487  |                        |
| AAV9-Syn-DIO-stChrimsonR-mRuby                       | Addgene                     | RRID:Addgene_105448  |                        |
| AAV9-CamKIIa-ChrimsonR-mScarlet-KV2.1                | Addgene                     | RRID:Addgene_124651  |                        |
| <i>Software and algorithms</i>                       |                             |                      |                        |
| Mworks                                               | The Mworks Project          |                      | mworks.github.io       |
| <i>Other</i>                                         |                             |                      |                        |
| C and B Metabond                                     | Parkell                     | S380                 |                        |
| Kwik-sil                                             | World Precision Instruments | KWIK-SIL             |                        |

702

### 703 *Resource Availability*

#### 704 • *Lead Contact*

705 Additional information and requests for resources should be directed to the lead contact,  
706 Mark Histed ([mark.histed@nih.gov](mailto:mark.histed@nih.gov))

#### 707 • *Materials availability*

708 This work did not produce novel reagents.

#### 709 • *Data and code availability*

710 Data and code will be published in a GitHub repository or on DANDI on acceptance for  
711 publication.

## 712 ***Experimental Model and Subject Details***

713 All procedures were approved by the NIMH Institutional Animal Care and Use Committee  
714 (IACUC) and conform to relevant regulatory standards. Emx1-cre animals<sup>30</sup> of both sexes (N =  
715 14; <https://www.jax.org/strain/005628>) were used for 2-photon and electrophysiology  
716 experiments (5 for electrophysiology, 3 for visual stimulation imaging, 6 for optogenetic  
717 stimulation imaging). For widefield imaging experiments, Ai162 (N = 2;  
718 <https://www.jax.org/strain/031562>) and Ai148 (N = 1; <https://www.jax.org/strain/030328>)  
719 animals<sup>50</sup> were crossed with the Cux2-CreERT2 line<sup>51</sup>  
720 ([https://www.mmrc.org/catalog/sds.php?mmrc\\_id=32779](https://www.mmrc.org/catalog/sds.php?mmrc_id=32779)), and GCaMP6f or GCaMP6s was  
721 induced via tamoxifen injection during adulthood (P22 or later, tamoxifen 2 mg intraperitoneally  
722 daily for 3 days). All animals were singly housed on a reversed light cycle. During experiments  
723 animals were water scheduled and given occasional water rewards to keep them awake and  
724 alert. To ensure animals did not drift into a quiet wakefulness or quiescent state, we monitored  
725 animals during data collection to verify they continued to drink the delivered reward.

## 726 ***Methods Details***

### 727 ***Implants and injections***

728 Details of the headplate and window procedures are described in previous studies<sup>13,52</sup>. Optical  
729 glass windows (3 mm diameter) were placed over V1 (center: -3 mm ML, +1.5 mm AP, relative  
730 to lambda) for 2p and widefield imaging. Windows were also used before electrophysiology for  
731 imaging to localize V1.

732 For Emx1-Cre animals, 300 nL of AAV9-syn-jGCaMP7s-WPRE (RRID:Addgene\_104487)  
733 and/or AAV9-Syn-DIO-stChrimsonR-mRuby (RRID:Addgene\_105448) were injected 250  $\mu$ m  
734 below the dura (200 nL/min) prior to cementing the cranial window. For Ai148 and 162 animals,  
735 AAV9-CamKIIa-stChrimsonR-mRuby2 was generated by cloning the CaMKIIa promoter  
736 (RRID:Addgene\_120219) into a pAAV backbone containing stChrimsonR-mRuby2  
737 (RRID:Addgene\_105447) and packaged into an AAV (Vigene, Inc.). This was injected at the  
738 same depth as the hSyn-DIO-stChrimsonR virus, but with 100 nL volume at 100 nL/min.

### 739 ***Electrophysiology***

740 Electrophysiological methods are described in detail in previous studies<sup>13</sup>, and are summarized  
741 here. Animals were head-fixed during recording. Before the first session of electrophysiology,  
742 the animal's cranial window was removed and the craniotomy was flushed with saline. Between  
743 recording sessions, the craniotomy was covered using Kwik-Sil polymer (WPI, Inc.). A fiber optic  
744 cannula (400  $\mu$ m diameter, 0.39 NA, Thorlabs) was placed to center light output at the center of  
745 stChrimsonR expression. For light intensity calculations, spot area was defined as the area  
746 inside the 50% contour of light spot intensity on the cortex, measured with a camera by imaging  
747 the spot on the brain surface. 1–2% agarose (Type IIIA, Sigma) was placed over the dura at the  
748 start of each session, and an array of four electrodes (4 probes, 32 sites in total, part #A4x8-  
749 5mm-100-400-177-A32, NeuroNexus, Inc.) were lowered into the cortex using a  
750 micromanipulator (Sutter MPC-200). One probe was placed at the center of the light spot.

751 Probes were advanced 600–1000  $\mu\text{m}$  below the point in which the first probe touched the dura.  
752 Probes were not moved for 1 hour prior to recording, as we found this improved recording  
753 stability. Recording data was sampled at 30 kHz (Cerebus, Blackrock Microsystems.)

754 Optogenetic stimulation was performed with randomly interleaved stimulation light pulses with  
755 several intensities over the range 0.2  $\text{mW}/\text{mm}^2$  to 15  $\text{mW}/\text{mm}^2$ . Stimulation pulses were 600 ms  
756 long and delivered with a 4 s period.

757  
758 For spike recordings, waveforms (bandpass filtered, 750 Hz – 7.5 kHz) were digitized and saved  
759 by storing a short data section around points where amplitude exceeded 3 times the RMS noise  
760 on that channel. Single units were identified (OfflineSorter, Plexon, Inc) based on clusters in the  
761 waveform PCA that were separate from noise and other clusters, had unimodal spike width  
762 distributions, and inter-spike intervals consistent with cortical neuron absolute and relative  
763 refractory periods. A single-unit score was assigned to each unit manually based on these  
764 factors<sup>13,23</sup>. To compare these populations quantitatively, we calculated SNR for both single and  
765 multiunits<sup>53,54</sup>. Median SNR for single units was larger than median SNR for multiunits (SU:  
766 3.32, MU: 2.26; Fig. S2C), consistent with prior reports<sup>13,53,55</sup>.

## 767 ***Histology***

768 Following completion of electrophysiology experiments, mice were anesthetized with isoflurane  
769 and injected intraperitoneally with pentobarbital sodium (150 mg/kg), and perfused transcardially  
770 with cold (4°C) PBS followed by cold 4% paraformaldehyde. Brains were extracted and fixed in  
771 4% paraformaldehyde for 6–12 hr and then cryoprotected in a 30% (% w/v) sucrose solution in  
772 PBS until they sank. Tissue was cryosectioned at 10 $\mu\text{m}$  and mounted on charged slides.  
773 Fluorescence in situ hybridization was done using RNAscope's Multiplex Fluorescent Assay  
774 v2<sup>56</sup>. Inhibitory neurons were labeled with a VGAT probe (Slc32a1, #319191-C2; Alexa Fluor  
775 488), excitatory neurons were labeled with a VGLUT1 probe (Slc17a7, #416631-C3; Cy5), and  
776 an mRuby2 probe (#487361; Cy3) labeled stChrimsonR-mRuby2 expressing neurons. Slides  
777 were coverslipped with DAPI. We imaged slides on a Zeiss LSM780 confocal microscope with a  
778 40x oil immersion objective. We imaged each fluorophore separately with a single excitation  
779 laser, and collected all three emission channels. To compensate for bleedthrough where the  
780 other two fluorophores might be weakly excited by a laser selected for another fluorophore, we  
781 subtracted a scaled version of the primary emission channel image for each non-selected  
782 fluorophore from the primary channel for the selected fluorophore. Five representative areas  
783 were quantified independently by two observers.

## 784 ***Visual stimulation***

785 Visual stimuli were presented using MWorks (<https://mworks.github.io/>). Grating stimuli  
786 (sinusoidal contrast variation, 0.1 cyc/deg, orientation = 0 deg) were masked with a circular  
787 raised-cosine envelope (15 deg FWHM). Visual stimuli were displayed on an LCD display, with  
788 center positioned 0-10 degrees of visual angle temporal to the central meridian. Oriented noise  
789 stimuli were generated by filtering white noise pixel arrays (each pixel drawn independently from  
790 a uniform distribution) with a spatial band-pass filter (peak orientation = 0 deg, orientation  
791 bandwidth = 10 deg, peak spatial frequency = 0.05, frequency bandwidth = 0.05). Frames were

792 generated at 60 Hz and the noise pattern was independent from frame to frame<sup>26–28</sup>. Visual  
793 stimuli were presented for 3 or 5 seconds, depending on the experiment.

### 794 ***2-photon imaging***

795 During 2-photon experiments, animals were awake, water-scheduled, and given periodic water  
796 rewards (20% probability per trial, reward once every 30 s on average). If animals stopped  
797 licking in response to the rewards, data collection was ended. We imaged GCaMP7s responses  
798 (920 nm excitation) with either a galvo-galvo (5 Hz) or resonant scanning (30 Hz) two-photon  
799 microscope. stChrimsonR-mRuby2 expression was imaged at 1000 nm. The microscopes used  
800 for imaging were built using MIMMS components ([https://www.janelia.org/open-science/mimms-](https://www.janelia.org/open-science/mimms-21-2020)  
801 [21-2020](https://www.janelia.org/open-science/mimms-21-2020)) and other custom components, built in-house or provided by Sutter Inc. A second light  
802 path, combined with the 2p stimulation light path before the tube lens using a dichroic, was used  
803 to stimulate stChrimsonR using 530nm light (CoolLED, pE-4000). For 200 ms long optogenetic  
804 pulses, we measured responses in the first frame after stimulation. For 4 s long optogenetic light  
805 pulses (6 s period), we imaged while stimulation was ongoing. To do this, we avoided  
806 stimulation artifacts by stimulating only during horizontal flyback (approximate pulse duration 19  
807  $\mu$ s, off time 44  $\mu$ s, duty cycle 30%, line rate 8kHz).

### 808 ***Widefield imaging***

809 For widefield imaging experiments, we used Ai162;Cux2-creERT2 or Ai148;Cux2-creERT2  
810 animals, expressing GCaMP6f or 6s in L2/3 excitatory cells. Animals were head-fixed and  
811 awake during widefield imaging experiments. Prior to imaging, a fiber optic cannula was aimed  
812 at the center of the focal stChrimsonR expression. Images were collected using a Zeiss  
813 microscope (Discovery V12) with a 1.0x objective using excitation light with wavelength  
814 centered at 475 nm (Xylis X-Cite XT720L). A Zyla 4.2 sCMOS camera (Oxford Instruments)  
815 collected images (100 ms exposure time, approximately 140 ms frame period) with 4-pixel  
816 binning. Laser powers were randomly interleaved, with 50 repetitions per laser power. Laser  
817 pulses were 600 ms long, and presented with 6 s period.

### 818 ***Analysis of electrophysiology data***

819 For spike rate plots, spike counts were binned (1 ms bins), and smoothed via LOWESS<sup>57</sup>. To  
820 classify units as having elevated or suppressed responses, we measured spike rate over 145–  
821 400 ms after stim onset, relative to baseline (-1020 ms–0 ms relative to stim onset) for 6  
822 mW/mm<sup>2</sup> stimulation intensity. To classify cells as wide- or narrow-waveform, we used a spike  
823 width threshold of 0.445 ms based on the bimodal distribution of waveform widths (Fig. 5B).  
824 This threshold is consistent with pharmacological segregation of inhibitory and excitatory cells<sup>13</sup>.  
825

826 For analysis of onset times, we fit a sigmoid (logistic function) to each cell's response from 100  
827 ms before to 100ms after laser pulse onset:

$$828 \quad f(x) = \frac{L}{1 + e^{-k(x-x_0)}} + b$$

829

830 L: upper asymptote, b: lower asymptote, k: slope,  $x_0$ : onset latency.  $X_0$  was constrained to the  
831 range [onset+0.5 ms, onset + 30 ms]. We defined onset latency as  $x_0$ , the time to half-max. To  
832 estimate the time to steady-state, the same function was fit to data from 500 ms before and after  
833 the laser onset, with the spike rates within a 50 ms window around the initial transient blanked  
834 by setting to the baseline firing rate. Each cell's time to steady-state was computed as the  
835 difference between the steady-state onset and the initial onset (difference between the  $x_0$   
836 parameters of the two fits).

### 837 ***Analysis of 2-photon data***

838 For short optogenetic stimulation (200 ms pulses) during two-photon imaging, we avoided  
839 stimulation light influencing imaging responses by measuring responses in the frame after the  
840 stimulus offset. For long pulses (4 s), we stimulated during imaging frames by restricting  
841 stimulation to imaging line flyback and intensities we give are the average intensity, corrected  
842 for the 30% stimulation duty cycle. Because we found that the LED device we used for  
843 stimulation (pE-4000, CoolLED Ltd; specified bandwidth 100 kHz) had some variability in  
844 onset/offset for each line, we removed pixels (~40% of frame) at left and right edges of field of  
845 view to ensure no stimulation light could affect images. Image frames were motion corrected  
846 using NoRMCorre through CalmAn<sup>58</sup>. Deconvolution was done with OASIS<sup>59</sup> via CalmAn. To  
847 ease interpretability of the deconvolution signals, each neuron's deconvolved signal was  
848 normalized to have the same maximum value as the  $dF/F$  of the corresponding fluorescence  
849 trace. To separate populations into elevated and suppressed cells, we performed a one-sample  
850 t-test ( $\alpha = 0.05$ , different from zero, two-tailed) on the deconvolved  $dF/F$  during the stimulation  
851 period (long pulses) or the frame just after the stimulation period (short pulses). For the short  
852 pulses, we used the frame just after stimulation to estimate responses for each neuron per trial.  
853 For the long pulses, we averaged data within the period 750 ms after stimulus onset to the  
854 stimulus offset in order to capture the steady-state response. For visual response data, data  
855 were preprocessed in the same manner as the short optogenetic stimulation experiments. We  
856 averaged steady-state responses from 750 ms after stimulus onset to stimulus offset.

857 For spatial analyses, we used the spatstat package<sup>60</sup> in R (ver. 4.2.3). For each individual  
858 animal, we tested the spatial distributions of elevated and suppressed responses against an  
859 inhomogeneous Poisson process model using the *Linhom* and *Lcross.inhom* functions. We  
860 used an inhomogeneous process as signal properties (e.g. slight tilt of imaging field) and  
861 biological properties (e.g. vasculature) may produce inhomogeneities in rate/intensity that could  
862 be mistaken for clustering. The L function estimates the expected number of discovered  
863 neurons for different diameter circular search areas centered on each neuron, given the  
864 modeled Poisson process. We corrected for windowing in the selected field-of-view using  
865 Ripley's isotropic correction. Global envelopes were generated (using the *envelope* function)  
866 with  $p < 0.05$ , Bonferroni-corrected.

867 For 2-photon opsin measurements, for each field of view we corrected for neuropil signal by  
868 manually selecting a region of neuropil with no visible cell bodies/processes and subtracting that  
869 intensity. We measured red fluorescence in donut-shaped regions of interest around the border  
870 of each cell mask. Each animal's distribution of opsin was normalized by dividing by their

871 maximum opsin fluorescence, and then combined. We fit a lognormal distribution via least-  
872 squares (details in Fig. S6).

### 873 ***Analysis of widefield imaging data***

874 Widefield fluorescence images were motion corrected for rigid translation, and any linear trend  
875 across the full imaging session was estimated via regression and subtracted. Deconvolution  
876 was done via Widefield Deconvolution<sup>61</sup>, which differs from single-neuron deconvolution  
877 algorithms like OASIS by dropping the sparsity assumption useful for spike trains of single  
878 neurons. This algorithm produces better results for aggregated signals, such as that from a  
879 single pixel during widefield imaging<sup>61</sup>. We rescaled the deconvolved signals to the maximum  
880 dF/F of the imaging data, as with the two-photon deconvolution. Comparison of Widefield  
881 Deconvolution, OASIS, and first-differencing is given in Fig. S3. For timecourse analyses, center  
882 and surround ROIs were defined as as the top 30% of elevated or suppressed pixels within a 1  
883 mm radius of the center of response. To average images across animals, images were aligned  
884 on the basis of their maximum response during the late stimulation period. For quantification of  
885 spatial falloff (Fig 4G–I), we found the peak, averaged the responses radially, and then fit a  
886 curve to the responses vs. distance (LOWESS; 95% CI via bootstrap). Crossing points are the  
887 minimum distance at which the 95% confidence interval contains zero.

### 888 ***Spiking network model***

889 We simulated a conductance-based neural network model with 10000 neurons (8000 excitatory,  
890 2000 inhibitory) to understand the recurrent features that contribute to the response properties  
891 we observe during excitatory cell stimulation. Simulations were performed using Brian2<sup>62</sup>.

892

893

894 Membrane and synaptic dynamics evolve according to the following equations:

895

896 
$$(1) C \frac{dV}{dt} = g_L(E_L - V) + g_E(E_E - V) + g_I(E_I - V) + I_{background} + c \cdot I_{opto}(t)$$

897

$$(2) \frac{dg_E}{dt} = -g_E/\tau_E$$

898

$$(3) \frac{dg_I}{dt} = -g_I/\tau_I$$

899 Each synapse was stepped by its corresponding connection weight for every presynaptic spike.

900 Connections between neurons were made with 2% probability, independently for each potential  
901 connection<sup>36,41,63</sup>.

| Parameter | Value  | Parameter         | Value  |
|-----------|--------|-------------------|--------|
| $\tau_E$  | 5 ms   | Mean $W_{II}$     | 4.0 nS |
| $\tau_I$  | 10 ms  | Variance $W_{II}$ | 4.0 nS |
| $E_L$     | -60 mV | Mean $W_{IE}$     | 5.0 nS |
| $E_I$     | -80 mV | Variance $W_{IE}$ | 5.0 nS |

|                   |         |                                                |          |
|-------------------|---------|------------------------------------------------|----------|
| $E_E$             | 0 mV    | E cell $I_{\text{background}}$<br>Full Network | 260 pA   |
| $g_L$             | 10.0 nS | I cell $I_{\text{background}}$<br>Full Network | 140 pA   |
| Mean $W_{EE}$     | 0.4 nS  | E cell $I_{\text{background}}$<br>50% Network  | 227.5 pA |
| Variance $W_{EE}$ | 0.4 nS  | I cell $I_{\text{background}}$<br>50% Network  | 172.5 pA |
| Mean $W_{EI}$     | 0.8 nS  | E cell $I_{\text{background}}$<br>25% Network  | 208.5 pA |
| Variance $W_{EI}$ | 0.8 nS  | I cell $I_{\text{background}}$<br>25% Network  | 191.5 pA |

902 **Table 1: Spiking neural network model parameters**

903 Synaptic weights were drawn from truncated (rectified) Gaussian distributions. Mean  
 904 connectivity parameters were based on published measurements, with excitatory connection  
 905 strength an order of magnitude weaker than inhibitory connection strength<sup>36,64,65</sup> and I-to-E  
 906 connectivity stronger than I-to-I connectivity<sup>65</sup>. Background currents were chosen for inhibitory  
 907 and excitatory cell populations to fix baseline firing-rates for each constructed network to data  
 908 (Fig S8F). Network parameters shown in Table 1.

#### 909 *Optogenetic stimulation simulations*

910 Optogenetic stimulation was an additional constant current for the length of the stimulation  
 911 period, with onset and offset ramped linearly over 3 ms. The strength of the optogenetic  
 912 stimulation ( $c$  in Eq. 1 was chosen from a lognormal distribution derived from data (Fig. 6), or  
 913 held constant (Fig. 7M,N). For each simulation, this stimulation distribution was scaled by a  
 914 constant to reproduce the response rate from data, at the 75<sup>th</sup> percentile across excitatory cells.  
 915 Steady-state response was measured for each cell as their firing rate during the 1 s baseline  
 916 period subtracted from the firing rate during the last 500 ms of the stimulation period. To reduce  
 917 connection strength variability (Fig. 7N), we reduced the variability of the truncated Gaussians  
 918 that define connection strength by a factor of 100 (setting both the synaptic strength variability  
 919 and connection number variability to zero produced a network that was less stable).

#### 920 *Single cell stimulation simulations*

921 A single cell was stimulated with intensity from maximum of input distribution (Fig. 7H). Controls:  
 922 same parameters but no stimulation. To simulate single cell stimulation with visual input, we  
 923 provided single cell stimulation during either the lognormal optogenetic stimulation, as  
 924 previously described, or during uniform input of both excitatory and inhibitory cells.

#### 925 *Balance index*

926 We computed the balance index as described by Ahmadian and Miller (2021). For each neuron,  
 927 we computed this index as the net current (excitatory + inhibitory) divided by the excitatory  
 928 current. The index becomes smaller as balance becomes tighter, with component currents  
 929 becoming larger, and the index becomes larger as inhibitory input from the network shrinks.

930 ***Quantification and Statistical Analysis***

931 All analyses, unless specifically noted in Methods Details, were performed in python using  
932 NumPy and SciPy packages<sup>57,66</sup>. Degrees of freedom and statistical tests are described in the  
933 results text. Error metrics plotted in figures are listed in the figure legends. Significance was  
934 adjusted for multiple testing using a Bonferroni correction when appropriate.



## 935 **References**

- 936 1. Van Essen, D.C., Anderson, C.H., and Felleman, D.J. (1992). Information Processing in the  
937 Primate Visual System: An Integrated Systems Perspective. *Science* 255, 419–423.  
938 10.1126/science.1734518.
- 939 2. Glickfeld, L.L., and Olsen, S.R. (2017). Higher-Order Areas of the Mouse Visual Cortex.  
940 *Annu. Rev. Vis. Sci.* 3, 251–273. 10.1146/annurev-vision-102016-061331.
- 941 3. Kravitz, D.J., Saleem, K.S., Baker, C.I., Ungerleider, L.G., and Mishkin, M. (2013). The  
942 ventral visual pathway: an expanded neural framework for the processing of object quality.  
943 *Trends Cogn. Sci.* 17, 26–49. 10.1016/j.tics.2012.10.011.
- 944 4. Van Essen, D.C., and Gallant, J.L. (1994). Neural mechanisms of form and motion  
945 processing in the primate visual system. *Neuron* 13, 1–10. 10.1016/0896-6273(94)90455-3.
- 946 5. Krizhevsky, A., Sutskever, I., and Hinton, G.E. (2012). ImageNet Classification with Deep  
947 Convolutional Neural Networks. In *Advances in Neural Information Processing Systems*  
948 (Curran Associates, Inc.).
- 949 6. Binzegger, T., Douglas, R.J., and Martin, K.A.C. (2004). A Quantitative Map of the Circuit of  
950 Cat Primary Visual Cortex. *J. Neurosci.* 24, 8441–8453. 10.1523/JNEUROSCI.1400-  
951 04.2004.
- 952 7. Hellwig, B. (2000). A quantitative analysis of the local connectivity between pyramidal  
953 neurons in layers 2/3 of the rat visual cortex. *Biol. Cybern.* 82, 111–121.  
954 10.1007/PL00007964.
- 955 8. Rossi, L.F., Harris, K.D., and Carandini, M. (2019). Excitatory and inhibitory intracortical  
956 circuits for orientation and direction selectivity. 556795. 10.1101/556795.
- 957 9. Douglas, R.J., Koch, C., Mahowald, M., Martin, K.A., and Suarez, H.H. (1995). Recurrent  
958 excitation in neocortical circuits. *Science* 269, 981–985. 10.1126/science.7638624.
- 959 10. Ahmadian, Y., and Miller, K.D. (2021). What is the dynamical regime of cerebral cortex?  
960 *Neuron*. 10.1016/j.neuron.2021.07.031.
- 961 11. Ozeki, H., Finn, I.M., Schaffer, E.S., Miller, K.D., and Ferster, D. (2009). Inhibitory  
962 Stabilization of the Cortical Network Underlies Visual Surround Suppression. *Neuron* 62,  
963 578–592. 10.1016/j.neuron.2009.03.028.
- 964 12. Sadeh, S., and Clopath, C. (2021). Inhibitory stabilization and cortical computation. *Nat.*  
965 *Rev. Neurosci.* 22, 21–37. 10.1038/s41583-020-00390-z.
- 966 13. Sanzeni, A., Akitake, B., Goldbach, H.C., Leedy, C.E., Brunel, N., and Histed, M.H. (2020).  
967 Inhibition stabilization is a widespread property of cortical networks. *eLife* 9, e54875.  
968 10.7554/eLife.54875.
- 969 14. Tsodyks, M.V., Skaggs, W.E., Sejnowski, T.J., and McNaughton, B.L. (1997). Paradoxical  
970 Effects of External Modulation of Inhibitory Interneurons. *J. Neurosci.* 17, 4382–4388.  
971 10.1523/JNEUROSCI.17-11-04382.1997.

- 972 15. Mahrach, A., Chen, G., Li, N., van Vreeswijk, C., and Hansel, D. (2020). Mechanisms  
973 underlying the response of mouse cortical networks to optogenetic manipulation. *eLife* 9,  
974 e49967. [10.7554/eLife.49967](https://doi.org/10.7554/eLife.49967).
- 975 16. Marshel, J.H., Kim, Y.S., Machado, T.A., Quirin, S., Benson, B., Kadmon, J., Raja, C.,  
976 Chibukhchyan, A., Ramakrishnan, C., Inoue, M., et al. (2019). Cortical layer-specific critical  
977 dynamics triggering perception. *Science* 365, eaaw5202. [10.1126/science.aaw5202](https://doi.org/10.1126/science.aaw5202).
- 978 17. Peron, S., Pancholi, R., Voelcker, B., Wittenbach, J.D., Ólafsdóttir, H.F., Freeman, J., and  
979 Svoboda, K. (2020). Recurrent interactions in local cortical circuits. *Nature*, 1–4.  
980 [10.1038/s41586-020-2062-x](https://doi.org/10.1038/s41586-020-2062-x).
- 981 18. Goldman, M.S. (2009). Memory without Feedback in a Neural Network. *Neuron* 61, 621–  
982 634. [10.1016/j.neuron.2008.12.012](https://doi.org/10.1016/j.neuron.2008.12.012).
- 983 19. Murphy, B.K., and Miller, K.D. (2009). Balanced Amplification: A New Mechanism of  
984 Selective Amplification of Neural Activity Patterns. *Neuron* 61, 635–648.  
985 [10.1016/j.neuron.2009.02.005](https://doi.org/10.1016/j.neuron.2009.02.005).
- 986 20. Chettih, S.N., and Harvey, C.D. (2019). Single-neuron perturbations reveal feature-specific  
987 competition in V1. *Nature* 567, 334–340. [10.1038/s41586-019-0997-6](https://doi.org/10.1038/s41586-019-0997-6).
- 988 21. Oldenburg, I.A., Hendricks, W.D., Handy, G., Shamardani, K., Bounds, H.A., Doiron, B., and  
989 Adesnik, H. (2022). The logic of recurrent circuits in the primary visual cortex.  
990 [2022.09.20.508739](https://doi.org/10.1101/2022.09.20.508739). [10.1101/2022.09.20.508739](https://doi.org/10.1101/2022.09.20.508739).
- 991 22. Sanzeni, A., Palmigiano, A., Nguyen, T.H., Luo, J., Nassi, J.J., Reynolds, J.H., Histed, M.H.,  
992 Miller, K.D., and Brunel, N. (2022). Mechanisms underlying reshuffling of visual responses  
993 by optogenetic stimulation in mice and monkeys. [2022.07.13.499597](https://doi.org/10.1101/2022.07.13.499597).  
994 [10.1101/2022.07.13.499597](https://doi.org/10.1101/2022.07.13.499597).
- 995 23. Histed, M.H. (2018). Feedforward Inhibition Allows Input Summation to Vary in Recurrent  
996 Cortical Networks. *eNeuro* 5, ENEURO.0356-17.2018. [10.1523/ENEURO.0356-17.2018](https://doi.org/10.1523/ENEURO.0356-17.2018).
- 997 24. Nassi, J.J., Avery, M.C., Cetin, A.H., Roe, A.W., and Reynolds, J.H. (2015). Optogenetic  
998 Activation of Normalization in Alert Macaque Visual Cortex. *Neuron* 86, 1504–1517.  
999 [10.1016/j.neuron.2015.05.040](https://doi.org/10.1016/j.neuron.2015.05.040).
- 1000 25. McGinley, M.J., Vinck, M., Reimer, J., Batista-Brito, R., Zagha, E., Cadwell, C.R., Tolias,  
1001 A.S., Cardin, J.A., and McCormick, D.A. (2015). Waking State: Rapid Variations Modulate  
1002 Neural and Behavioral Responses. *Neuron* 87, 1143–1161. [10.1016/j.neuron.2015.09.012](https://doi.org/10.1016/j.neuron.2015.09.012).
- 1003 26. Beaudot, W.H.A., and Mullen, K.T. (2006). Orientation discrimination in human vision:  
1004 Psychophysics and modeling. *Vision Res.* 46, 26–46. [10.1016/j.visres.2005.10.016](https://doi.org/10.1016/j.visres.2005.10.016).
- 1005 27. Bondy, A.G., Haefner, R.M., and Cumming, B.G. (2018). Feedback determines the structure  
1006 of correlated variability in primary visual cortex. *Nat. Neurosci.* 21, 598–606.  
1007 [10.1038/s41593-018-0089-1](https://doi.org/10.1038/s41593-018-0089-1).

- 1008 28. Rolfs, M., and Carrasco, M. (2012). Rapid Simultaneous Enhancement of Visual Sensitivity  
1009 and Perceived Contrast during Saccade Preparation. *J. Neurosci.* 32, 13744–13752a.  
1010 10.1523/JNEUROSCI.2676-12.2012.
- 1011 29. Nakajima, M., Schmitt, L.I., and Halassa, M.M. (2019). Prefrontal Cortex Regulates Sensory  
1012 Filtering through a Basal Ganglia-to-Thalamus Pathway. *Neuron* 103, 445–458.e10.  
1013 10.1016/j.neuron.2019.05.026.
- 1014 30. Gorski, J.A., Talley, T., Qiu, M., Puelles, L., Rubenstein, J.L.R., and Jones, K.R. (2002).  
1015 Cortical Excitatory Neurons and Glia, But Not GABAergic Neurons, Are Produced in the  
1016 Emx1-Expressing Lineage. *J. Neurosci.* 22, 6309–6314. 10.1523/JNEUROSCI.22-15-  
1017 06309.2002.
- 1018 31. Watakabe, A., Ohtsuka, M., Kinoshita, M., Takaji, M., Isa, K., Mizukami, H., Ozawa, K., Isa,  
1019 T., and Yamamori, T. (2015). Comparative analyses of adeno-associated viral vector  
1020 serotypes 1, 2, 5, 8 and 9 in marmoset, mouse and macaque cerebral cortex. *Neurosci.*  
1021 *Res.* 93, 144–157. 10.1016/j.neures.2014.09.002.
- 1022 32. Ahmadian, Y., Rubin, D.B., and Miller, K.D. (2013). Analysis of the Stabilized Supralinear  
1023 Network. *Neural Comput.* 25, 1994–2037. 10.1162/NECO\_a\_00472.
- 1024 33. Renart, A., de la Rocha, J., Bartho, P., Hollender, L., Parga, N., Reyes, A., and Harris, K.D.  
1025 (2010). The Asynchronous State in Cortical Circuits. *Science* 327, 587–590.  
1026 10.1126/science.1179850.
- 1027 34. Li, N., Chen, S., Guo, Z.V., Chen, H., Huo, Y., Inagaki, H.K., Chen, G., Davis, C., Hansel,  
1028 D., Guo, C., et al. (2019). Spatiotemporal constraints on optogenetic inactivation in cortical  
1029 circuits. *eLife* 8, e48622. 10.7554/eLife.48622.
- 1030 35. Schneider, F., Gradmann, D., and Hegemann, P. (2013). Ion Selectivity and Competition in  
1031 Channelrhodopsins. *Biophys. J.* 105, 91–100. 10.1016/j.bpj.2013.05.042.
- 1032 36. Ko, H., Hofer, S.B., Pichler, B., Buchanan, K.A., Sjöström, P.J., and Mrsic-Flogel, T.D.  
1033 (2011). Functional specificity of local synaptic connections in neocortical networks. *Nature*  
1034 473, 87–91. 10.1038/nature09880.
- 1035 37. Podlaski, W., Russell, L.E., Roth, A., Bicknell, B., Häusser, M., and Machens, C. (2022).  
1036 The dynamical regime of mouse visual cortex shifts from cooperation to competition with  
1037 increasing visual input | *Cosyne 2022*. [https://www.world-wide.org/cosyne-22/dynamical-  
1038 regime-mouse-visual-cortex-5af75de1/](https://www.world-wide.org/cosyne-22/dynamical-regime-mouse-visual-cortex-5af75de1/).
- 1039 38. Angelucci, A., and Bressloff, P.C. (2006). Contribution of feedforward, lateral and feedback  
1040 connections to the classical receptive field center and extra-classical receptive field  
1041 surround of primate V1 neurons. In *Progress in Brain Research Visual Perception.*, S.  
1042 Martinez-Conde, S. L. Macknik, L. M. Martinez, J.-M. Alonso, and P. U. Tse, eds. (Elsevier),  
1043 pp. 93–120. 10.1016/S0079-6123(06)54005-1.
- 1044 39. Pancholi, R., Sun-Yan, A., and Peron, S. (2023). Microstimulation of sensory cortex  
1045 engages natural sensory representations. *Curr. Biol.* 33, 1765–1777.e5.  
1046 10.1016/j.cub.2023.03.085.

- 1047 40. Arellano, J., Benavides-Piccione, R., DeFelipe, J., and Yuste, R. (2007). Ultrastructure of  
1048 dendritic spines: correlation between synaptic and spine morphologies. *Front. Neurosci.* *1*,  
1049 10. 10.3389/neuro.01.1.1.010.2007.
- 1050 41. Holmgren, C., Harkany, T., Svennenfors, B., and Zilberter, Y. (2003). Pyramidal cell  
1051 communication within local networks in layer 2/3 of rat neocortex. *J. Physiol.* *551*, 139–153.  
1052 10.1111/j.1469-7793.2003.00139.x.
- 1053 42. Song, S., Sjöström, P.J., Reigl, M., Nelson, S., and Chklovskii, D.B. (2005). Highly  
1054 Nonrandom Features of Synaptic Connectivity in Local Cortical Circuits. *PLOS Biol.* *3*, e68.  
1055 10.1371/journal.pbio.0030068.
- 1056 43. Chapeton, J., Fares, T., LaSota, D., and Stepanyants, A. (2012). Efficient associative  
1057 memory storage in cortical circuits of inhibitory and excitatory neurons. *Proc. Natl. Acad.*  
1058 *Sci.* *109*, E3614–E3622. 10.1073/pnas.1211467109.
- 1059 44. Loewenstein, Y., Kuras, A., and Rumpel, S. (2011). Multiplicative Dynamics Underlie the  
1060 Emergence of the Log-Normal Distribution of Spine Sizes in the Neocortex In Vivo. *J.*  
1061 *Neurosci.* *31*, 9481–9488. 10.1523/JNEUROSCI.6130-10.2011.
- 1062 45. Litwin-Kumar, A., Rosenbaum, R., and Doiron, B. (2016). Inhibitory stabilization and visual  
1063 coding in cortical circuits with multiple interneuron subtypes. *J. Neurophysiol.* *115*, 1399–  
1064 1409. 10.1152/jn.00732.2015.
- 1065 46. Bos, H., Oswald, A.-M., and Doiron, B. (2020). Untangling stability and gain modulation in  
1066 cortical circuits with multiple interneuron classes. 2020.06.15.148114.  
1067 10.1101/2020.06.15.148114.
- 1068 47. Dalgleish, H.W., Russell, L.E., Packer, A.M., Roth, A., Gauld, O.M., Greenstreet, F.,  
1069 Thompson, E.J., and Häusser, M. (2020). How many neurons are sufficient for perception of  
1070 cortical activity? *eLife* *9*, e58889. 10.7554/eLife.58889.
- 1071 48. Packer, A.M., Peterka, D.S., Hirtz, J.J., Prakash, R., Deisseroth, K., and Yuste, R. (2012).  
1072 Two-photon optogenetics of dendritic spines and neural circuits. *Nat. Methods* *9*, 1202–  
1073 1205. 10.1038/nmeth.2249.
- 1074 49. Sadeh, S., and Clopath, C. (2020). Theory of neuronal perturbome in cortical networks.  
1075 *Proc. Natl. Acad. Sci.* *117*, 26966–26976. 10.1073/pnas.2004568117.
- 1076 50. Daigle, T.L., Madisen, L., Hage, T.A., Valley, M.T., Knoblich, U., Larsen, R.S., Takeno,  
1077 M.M., Huang, L., Gu, H., Larsen, R., et al. (2018). A Suite of Transgenic Driver and Reporter  
1078 Mouse Lines with Enhanced Brain-Cell-Type Targeting and Functionality. *Cell* *174*, 465-  
1079 480.e22. 10.1016/j.cell.2018.06.035.
- 1080 51. Franco, S.J., Gil-Sanz, C., Martinez-Garay, I., Espinosa, A., Harkins-Perry, S.R., Ramos, C.,  
1081 and Müller, U. (2012). Fate-Restricted Neural Progenitors in the Mammalian Cerebral  
1082 Cortex. *Science* *337*, 746–749. 10.1126/science.1223616.
- 1083 52. Goldbach, H.C., Akitake, B., Leedy, C.E., and Histed, M.H. (2021). Performance in even a  
1084 simple perceptual task depends on mouse secondary visual areas. *eLife* *10*, e62156.  
1085 10.7554/eLife.62156.

- 1086 53. Kelly, R.C., Smith, M.A., Samonds, J.M., Kohn, A., Bonds, A.B., Movshon, J.A., and Lee,  
1087 T.S. (2007). Comparison of Recordings from Microelectrode Arrays and Single Electrodes in  
1088 the Visual Cortex. *J. Neurosci.* 27, 261–264. 10.1523/JNEUROSCI.4906-06.2007.
- 1089 54. Nordhausen, C.T., Maynard, E.M., and Normann, R.A. (1996). Single unit recording  
1090 capabilities of a 100 microelectrode array. *Brain Res.* 726, 129–140. 10.1016/0006-  
1091 8993(96)00321-6.
- 1092 55. Wissig, S.C., and Kohn, A. (2012). The influence of surround suppression on adaptation  
1093 effects in primary visual cortex. *J. Neurophysiol.* 107, 3370–3384. 10.1152/jn.00739.2011.
- 1094 56. Wang, F., Flanagan, J., Su, N., Wang, L.-C., Bui, S., Nielson, A., Wu, X., Vo, H.-T., Ma, X.-  
1095 J., and Luo, Y. (2012). RNAscope: a novel in situ RNA analysis platform for formalin-fixed,  
1096 paraffin-embedded tissues. *J. Mol. Diagn. JMD* 14, 22–29. 10.1016/j.jmoldx.2011.08.002.
- 1097 57. Virtanen, P., Gommers, R., Oliphant, T.E., Haberland, M., Reddy, T., Cournapeau, D.,  
1098 Burovski, E., Peterson, P., Weckesser, W., Bright, J., et al. (2020). SciPy 1.0: fundamental  
1099 algorithms for scientific computing in Python. *Nat. Methods* 17, 261–272. 10.1038/s41592-  
1100 019-0686-2.
- 1101 58. Giovannucci, A., Friedrich, J., Gunn, P., Kalfon, J., Brown, B.L., Koay, S.A., Taxidis, J.,  
1102 Najafi, F., Gauthier, J.L., Zhou, P., et al. (2019). CalmAn an open source tool for scalable  
1103 calcium imaging data analysis. *eLife* 8, e38173. 10.7554/eLife.38173.
- 1104 59. Friedrich, J., Zhou, P., and Paninski, L. (2017). Fast online deconvolution of calcium  
1105 imaging data. *PLOS Comput. Biol.* 13, e1005423. 10.1371/journal.pcbi.1005423.
- 1106 60. Baddeley, A., Rubak, E., and Turner, R. (2015). *Spatial Point Patterns: Methodology and*  
1107 *Applications with R* (CRC Press).
- 1108 61. Stern, M., Shea-Brown, E., and Witten, D. (2020). Inferring the Spiking Rate of a Population  
1109 of Neurons from Wide-Field Calcium Imaging 10.1101/2020.02.01.930040.
- 1110 62. Stimberg, M., Brette, R., and Goodman, D.F. (2019). Brian 2, an intuitive and efficient neural  
1111 simulator. *eLife* 8, e47314. 10.7554/eLife.47314.
- 1112 63. Song, S., Sjöström, P.J., Reigl, M., Nelson, S., and Chklovskii, D.B. (2005). Highly  
1113 Nonrandom Features of Synaptic Connectivity in Local Cortical Circuits. *PLOS Biol.* 3, e68.  
1114 10.1371/journal.pbio.0030068.
- 1115 64. Xue, M., Atallah, B.V., and Scanziani, M. (2014). Equalizing excitation–inhibition ratios  
1116 across visual cortical neurons. *Nature* 511, 596–600. 10.1038/nature13321.
- 1117 65. Jiang, X., Shen, S., Cadwell, C.R., Berens, P., Sinz, F., Ecker, A.S., Patel, S., and Tolias,  
1118 A.S. (2015). Principles of connectivity among morphologically defined cell types in adult  
1119 neocortex. *Science* 350, aac9462. 10.1126/science.aac9462.
- 1120 66. Harris, C.R., Millman, K.J., van der Walt, S.J., Gommers, R., Virtanen, P., Cournapeau, D.,  
1121 Wieser, E., Taylor, J., Berg, S., Smith, N.J., et al. (2020). Array programming with NumPy.  
1122 *Nature* 585, 357–362. 10.1038/s41586-020-2649-2.

1123

1124

## 1125 Supplemental Figures

### 1126 Figure S1

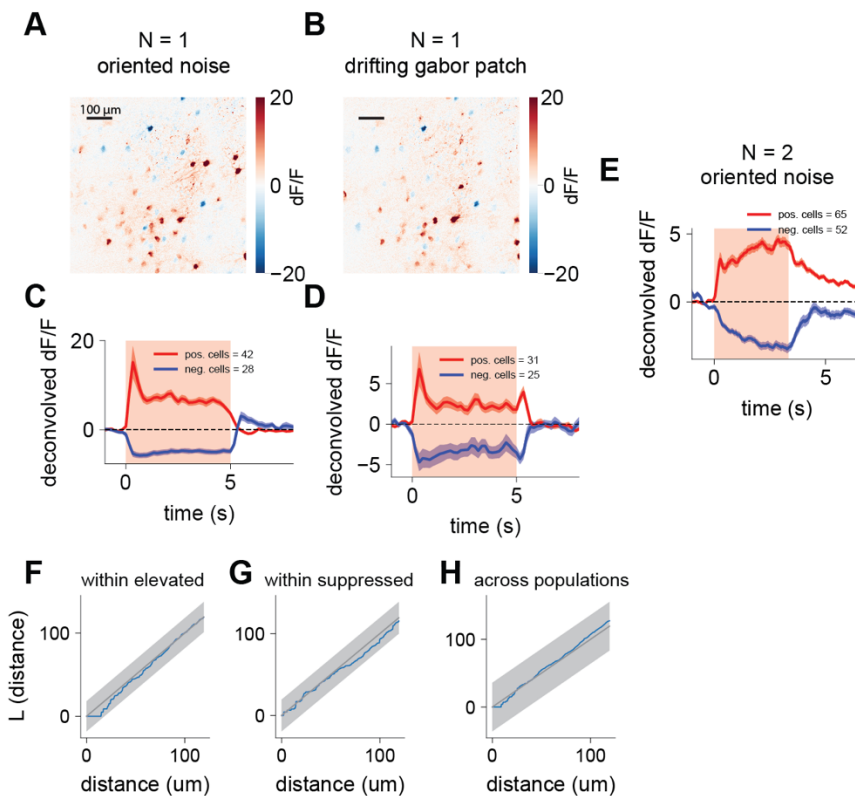

1127

1128 **Figure S1: (A-E): Both grating patches and oriented noise stimuli produce steady-state**  
 1129 **elevation and suppression in layer 2/3 of V1. (A)** dF/F response at each imaging pixel to  
 1130 oriented noise stimuli (small stimulus, FWHM = 15 deg, stimulus approximately aligned to cells'  
 1131 receptive fields measured outside this experiment, same animal as in Fig. 1), corresponding to  
 1132 the deconvolved cell responses shown in Fig. 1B. Here and in Fig. 1B, responses are measured  
 1133 beginning 750 ms after stimulus onset to focus on steady-state response (Methods.) Evidence  
 1134 of suppression is seen here but is more evident when data is deconvolved (compare this panel  
 1135 to Fig. 1B), as expected for sustained suppression preceded by a transient, as the initial  
 1136 transient seen in Figs. 2, 3, 7. **(B)** dF/F response to a drifting grating (Gabor patch, spatial  
 1137 frequency 0.1 cpd, FWHM 15 deg), from the same animal, showing cells that are elevated and  
 1138 suppressed in response to drifting gratings. Overall pattern of responses to noise stimulus and  
 1139 grating is similar. **(C)** Deconvolved population response to oriented noise stimulus (replicated  
 1140 from Fig. 1F for comparison.) Stimulus on during time indicated by light red shaded box. **(D)**  
 1141 Deconvolved cell responses to Gabor patch, same data as in (B). Gabor patches drive both  
 1142 steady-state elevation and suppression, though show signs of stronger off responses and  
 1143 potentially a larger onset transient. **(E)** Population deconvolved response to oriented noise  
 1144 stimulus in two additional animals, consistent with effects from example animal. **(F-H): Spatial**  
 1145 **distributions of elevated and suppressed cells are consistent with an inhomogeneous**

1146 **spatial Poisson process, independent within and across classes. (F-H)** Example L-  
1147 functions (Baddeley et al., 2015) from a typical animal (blue: data, black: expectation from  
1148 Poisson process model, error bars: global envelopes of Poisson process model), showing  
1149 agreement with the Poisson process model within elevated, suppressed, and across  
1150 populations, respectively (all  $p > 0.05$ , Bonferroni correction). See Methods for analysis details.



1151 Figure S2

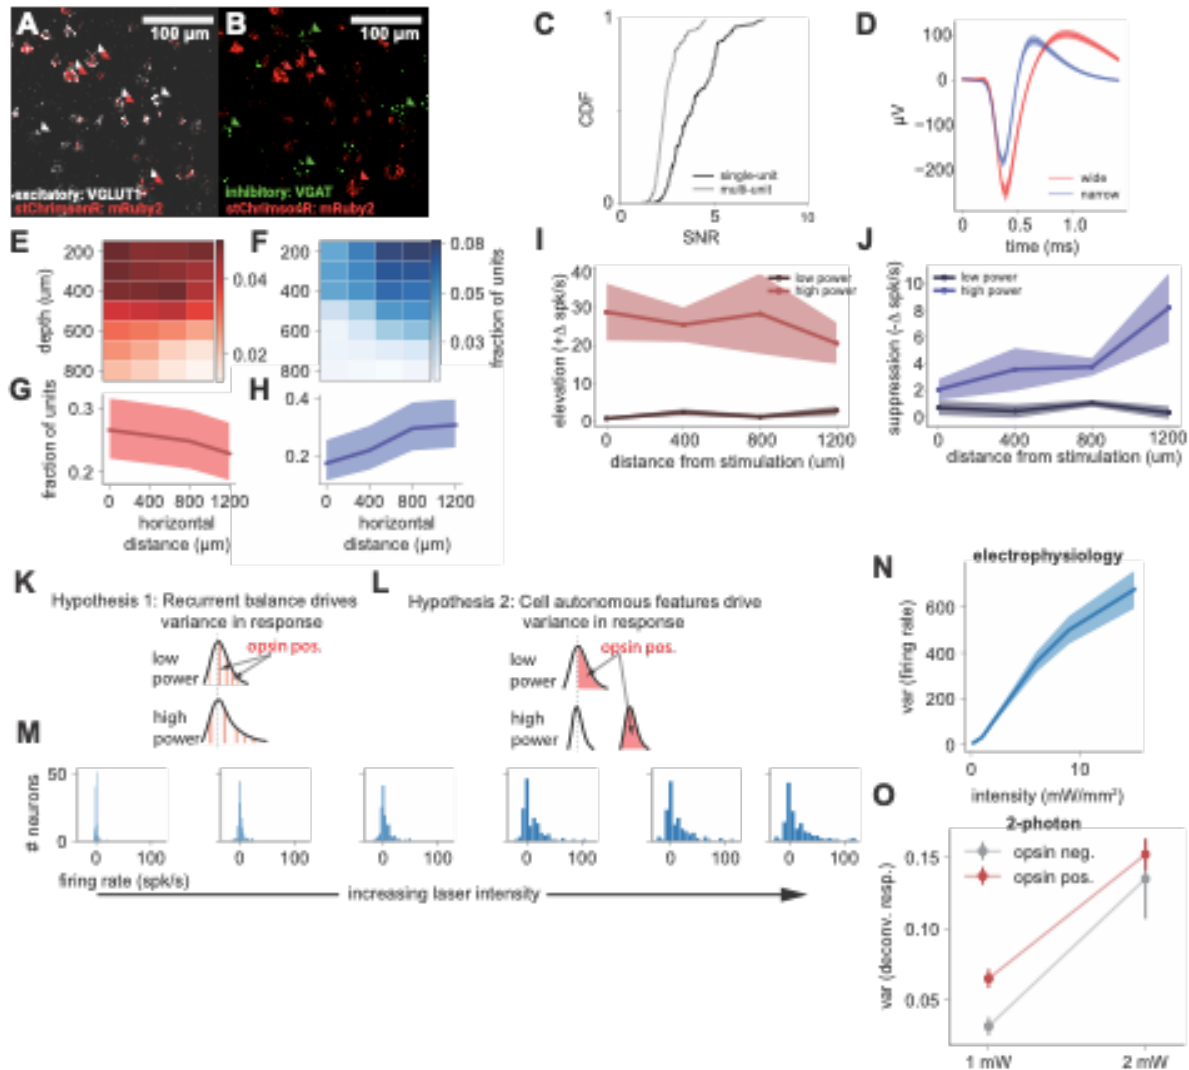

1152

1153 Figure S2: **(A-B): Viral approach expresses opsin in only excitatory cells.** **(A)** Selective  
 1154 expression of opsin in excitatory cells only, as expected for the double-inverted lox-site AAV  
 1155 vector and excitatory Cre mouse line (Emx1-Cre). The stChrimsonR opsin was fused to  
 1156 mRuby2, so we measured mRuby2 mRNA (red) and VGLUT1 mRNA (white), a marker of  
 1157 excitatory cells, via fluorescent in situ hybridization (RNAscope; Methods). Cell counting showed  
 1158 76% of neurons are VGLUT1 positive (N = 195/257). Arrows highlight a few example neurons.  
 1159 As expected, all cells that express the opsin are excitatory, but not all excitatory neurons  
 1160 express the opsin (59% of VGLUT1 cells are mRuby2 positive: N = 115/195). **(B)** mRuby2  
 1161 mRNA (red) and VGAT mRNA (green), a marker of inhibitory neurons. 24% of neurons are  
 1162 VGAT positive (N = 62/257), and zero express the opsin. **(C-D): Sorting and quality of**

1163 **electrophysiology data (C)** Single units demonstrate higher SNR (N=136, median = 3.32) than  
1164 multi-units (N=184, median = 2.26). **(D)** Mean spike-waveform of putative excitatory units (wide)  
1165 in red (N = 94), mean spike-waveform of putative inhibitory units (narrow) in blue (N = 42.)  
1166 Bimodal histogram of spike widths is shown in Fig. 5B. **(E-H): Number of detected elevated**  
1167 **and suppressed units by depth and horizontal distance, presented in terms of proportion**  
1168 **of the units in the population. (E-F)** Fraction of neurons found at each depth and horizontal  
1169 distance for elevated (red) and suppressed (blue) neuron populations. **(G-H)** Same as A-B, but  
1170 summed across depth. Error bars: Wilson score 95% CIs. **Steady-state firing rates of**  
1171 **neurons in layer 2/3 follow a weak spatial gradient with similar trends as the spatial**  
1172 **distribution observed in cell counts. (I)** Elevated cell steady-state rates, with the highest and  
1173 lowest powers for comparison. Rate is the difference in firing rate during stimulation relative to  
1174 baseline. **(J)** Suppressed cell steady-state rates, with the highest and lowest powers for  
1175 comparison, measured in relation to decreases from baseline. **(K-O): Shape and variance of**  
1176 **response distributions are inconsistent with cell-autonomous effects. (K)** Competing  
1177 hypotheses for response distribution shape. If the variance in responses is driven by network  
1178 input, we would expect that responses would not be strongly correlated to opsin expression  
1179 levels, and also as stimulation increases, response variance would also increase. **(L)** If cell-  
1180 autonomous features like opsin expression levels drive the responses at high powers, the opsin  
1181 input should dominate network input, leading to variance decreases and/or a bimodal response  
1182 distribution. **(M)** Histograms of the electrophysiological response for increasing laser intensities.  
1183 **(N)** Variance of the distributions in (A), plotted across laser intensity. Shaded blue: standard  
1184 error. **(O)** Two-photon response variance to optogenetic stimulation, sorted by estimates of  
1185 opsin expression. We see an increase in variance in both the opsin positive and negative cells,  
1186 which does not support the cell-autonomous account.

1187

1188 Figure S3

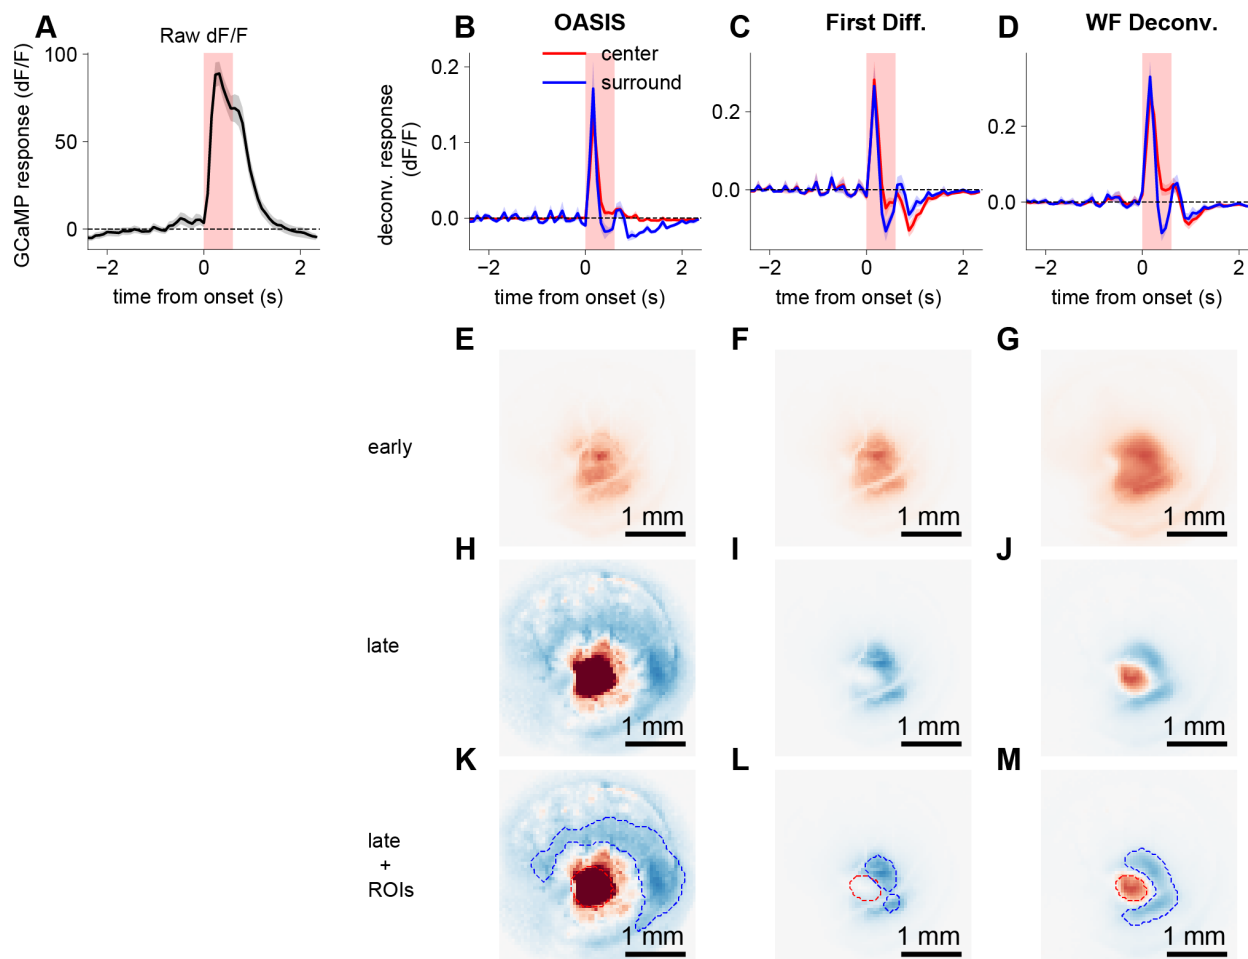

1189

1190 **Figure S3: Center-surround organization is present regardless of deconvolution method.**  
1191 **(A)** Mean whole-frame dF/F GCaMP response in an example animal. **(B)** We tested 3 different  
1192 methods of deconvolution, OASIS<sup>59</sup>, first-differences (i.e. subtracting one frame from the  
1193 previous), and Widefield Deconvolution<sup>61</sup>. Widefield Deconvolution is expected to be the best  
1194 method, as it is designed for data like this and does not incorporate the sparse-event constraints  
1195 of OASIS, which is designed for single neurons. We found similar time-series results for each of  
1196 the methods. The first-differences method (i.e. deconvolution with an kernel that decays  
1197 immediately) seems to overestimate decreases in firing rate, as might be expected. All panels  
1198 use the same dataset. **(E, F, G)** Spatial distribution of responses during the early laser period.  
1199 All deconvolution methods produce a qualitatively similar excitatory response during this early  
1200 period. **(H, I, J)** Spatial distributions of responses during late laser period demonstrates slight  
1201 differences in size of surround, but overall a qualitatively similar center-surround organization  
1202 with all methods. **(K, L, M)** Spatial distributions of response during the late laser period, but with  
1203 dashed contours depicting the manually-drawn regions of interest (ROIs) that we used to  
1204 produce the time-series data in **(B, C, D)**, with red dashed contours representing the center  
1205 ROIs, and blue dashed contours representing the surround ROIs.

1206 Figure S4  
1207

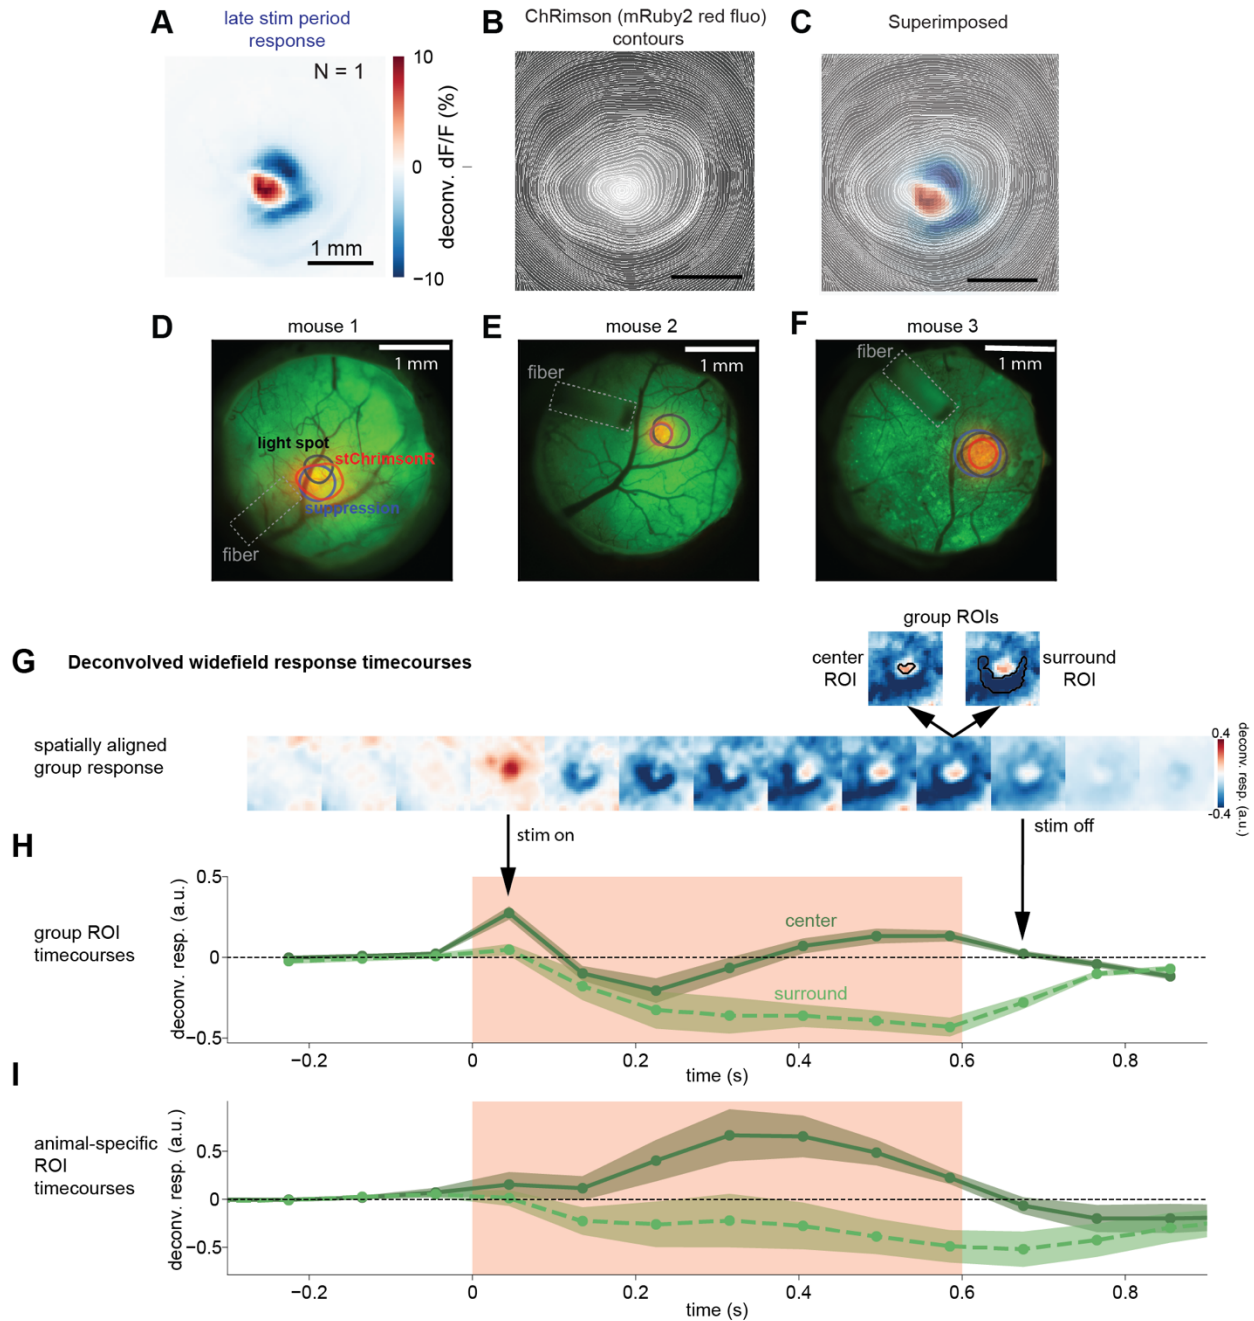

1208

1209 **Figure S4: (A-C): Stimulation response correlates to the pattern of stChrimsonR**  
1210 **expression. (A)** Example animal's response during the late stim period. **(B)** Example animal's  
1211 stChrimsonR expression pattern (gray: fluorescence) with overlaid contours of fluorescence  
1212 intensity. **(C)** Example animal's response during the late stim period overlaid with their  
1213 stChrimsonR contours. **(D-F): Expression and surround response of each mouse in the**  
1214 **widefield dataset. (D-F)** Field-of-view showing GCaMP expression (green image),

1215 stChrimsonR expression (red image). Contours: black = 80% of maximum illumination, red =  
1216 80% of maximum expression, blue = local minimum of the surround suppression. **(G-I):**  
1217 **Spatiotemporal response pattern of widefield response to excitatory cell stimulation. (G)**  
1218 Response over time, each frame corresponding to a timepoint in the timecourse in (B). Group  
1219 ROIs were selected as the top 30% of positively or negatively responding pixels within 1 mm of  
1220 the center of response and were used to compute the timecourses in (B); Methods. **(H)**  
1221 Timecourse of the response in the center and surround in the group-averaged signal. Error:  
1222 standard deviation across pixels. **(I)** Reproduction of Fig. 4D. Same as (B), but each animal's  
1223 timecourse was generated from their individual data and then averaged, resulting in less  
1224 smoothing between center and surround due to small variations in optogenetic expression  
1225 region size across animals. Error: standard error across animals.

1226

1227 Figure S5

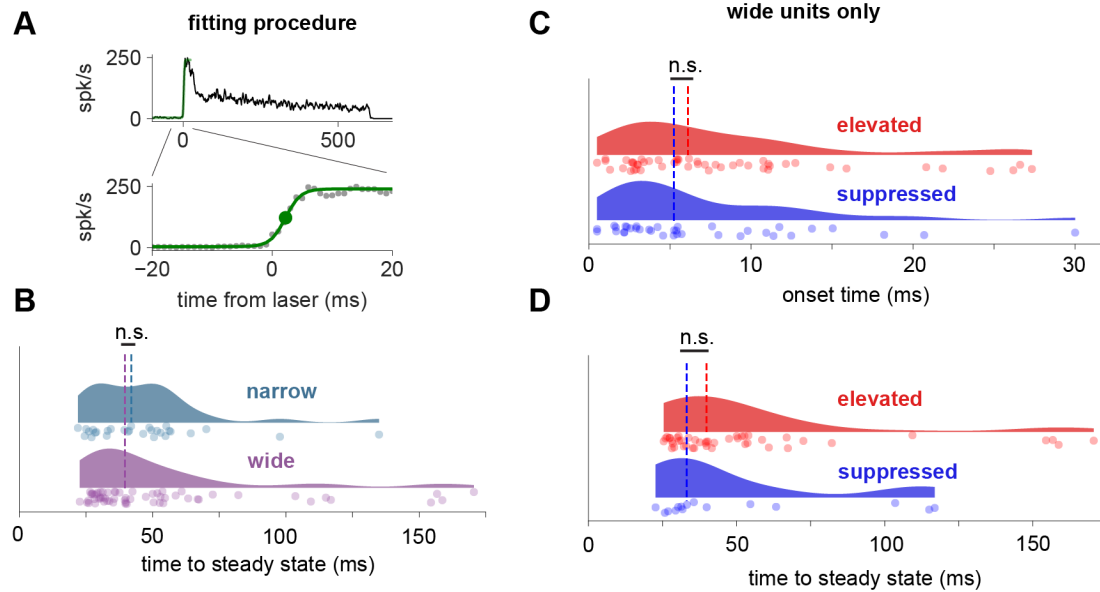

1228

1229 Figure S5: Differences in dynamics are restricted to those seen between the onset of  
1230 wide- and narrow-waveform cells. The excitatory and inhibitory (wide- and narrow-) onset  
1231 latency difference is shown in Fig. 7C. Other quantities shown here do not differ: wide- vs  
1232 narrow (excitatory vs inhibitory) time to steady state (B), and onset time and time to steady state  
1233 (C,D) for elevated and suppressed groups of wide-waveform excitatory cells. (A) Example  
1234 single neuron firing rate with fits. To obtain the onsets for individual cells, each cell's mean  
1235 timecourse was smoothed with width dependent on the detectability of the transient signal  
1236 (SNR; Methods), then a logistic function was fit to data from time range [-100ms, 100ms]. The  
1237 onset time (latency) was defined as the time to half-max of the logistic function. (B) No  
1238 difference in median time to steady state was found across narrow-spiking and wide-spiking  
1239 cells. (C) No difference in median onset time for elevated and suppressed groups of wide-  
1240 waveform (excitatory) cells. (D) Same as B, but difference in median time to steady-state.

1241 Figure S6

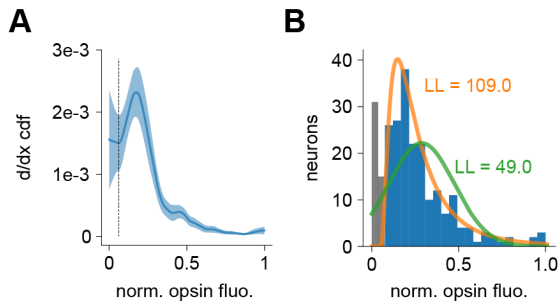

1242

1243 Figure S6: **Distributions of opsin fluorescence measured in vivo.** (A) Red channel after  
1244 neuropil correction (Methods). Y-axis, first derivative of CDF, smoothed with LOWESS; point  
1245 separating non-expressing neurons (left, below dashed line) and expressing (above dashed  
1246 line) is set at the local minimum. Error bars (light blue): bootstrapped standard error (N=244  
1247 neurons, N=3 animals). (B) Histogram, same data. The log-likelihoods (LLs) indicate that a  
1248 lognormal distribution (orange) fits the observed distribution better than a Gaussian (green).  
1249 Shown: fits used for simulations, excluding non-expressing neurons (gray). LLs, lognormal =  
1250 109.0, Gaussian 49.0. (LLs when including all neurons: lognormal = 95.3, Gaussian = 47.5).

1251 Figure S7

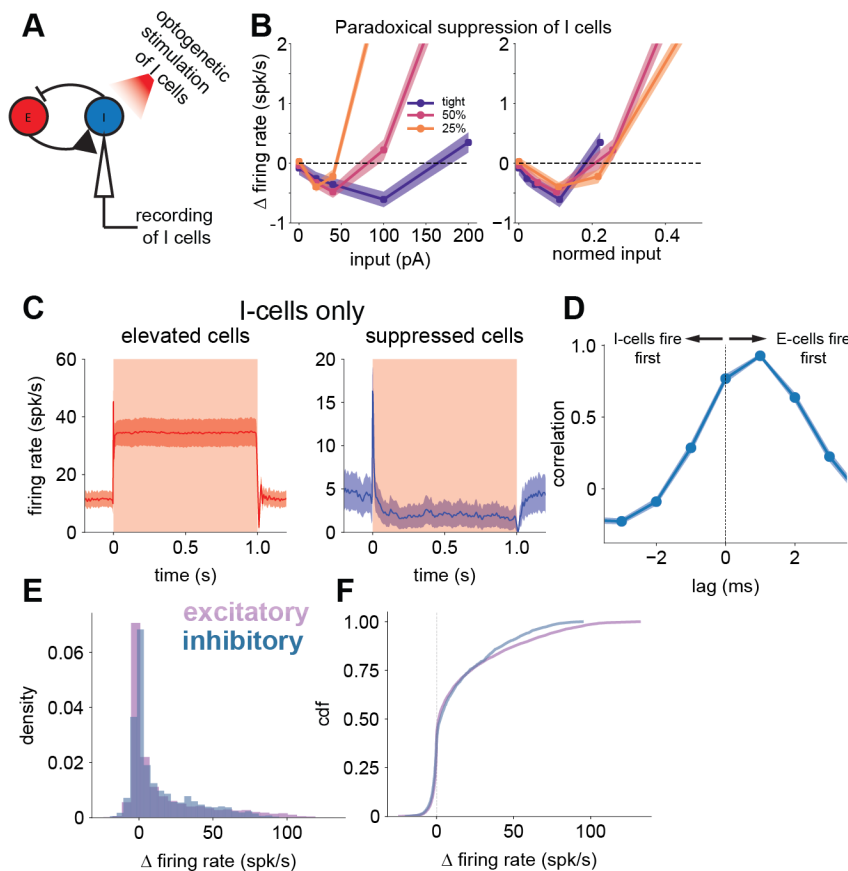

1252  
 1253 **Figure S7: (A-B): Networks at all tested recurrent strengths operate within the ISN regime.**  
 1254 **(A)** To examine paradoxical suppression, we record the steady-state responses of the I cells in  
 1255 response to different levels of stimulation. We performed this experiment on all networks  
 1256 presented in Figure 8. **(B left)** Steady-state responses of the I cell population to 5 levels of  
 1257 stimulation. Error bars are standard error to the mean. Graph has been zoomed into the region  
 1258 which clearly shows paradoxical suppression in all 3 networks. This paradoxical suppression is  
 1259 predicted for both loosely and tightly balanced networks. Our simulations used three recurrent  
 1260 strength values, one in the tight-balance regime and two in the loose-balance regime, and we  
 1261 confirmed that all three showed paradoxical effects of suppression when I cells are stimulated  
 1262 **(B right)** Same as (B left) but input normalized by the input value calculated in Fig. 8 to drive  
 1263 each network to the same firing rate (input level that achieves same value of the 75<sup>th</sup> percentile  
 1264 of evoked rates; see Fig. 8). **(C-F): Inhibitory neurons in balanced state model show similar**  
 1265 **responses to excitatory neurons but are recruited after initial stimulation. (C)** Mean  
 1266 timecourses for elevated and suppressed inhibitory cells (left and right, respectively) show the  
 1267 same characteristic transient response followed by steady-state responses. **(D)** Cross-  
 1268 correlation analysis of E- and I-cell response. Network has no synaptic delays built into the  
 1269 model. E-cells respond to direct stimulation, and then I-cells are recruited after. **(E)** Population  
 1270 distribution of steady-state responses is similar across E- and I-cells, though excitatory cells  
 1271 show a slightly longer-tailed positive response (true in the data as well; Fig. 5E), as seen  
 1272 through the distribution of responses or their corresponding CDFs **(F)**



1273 Figure S8

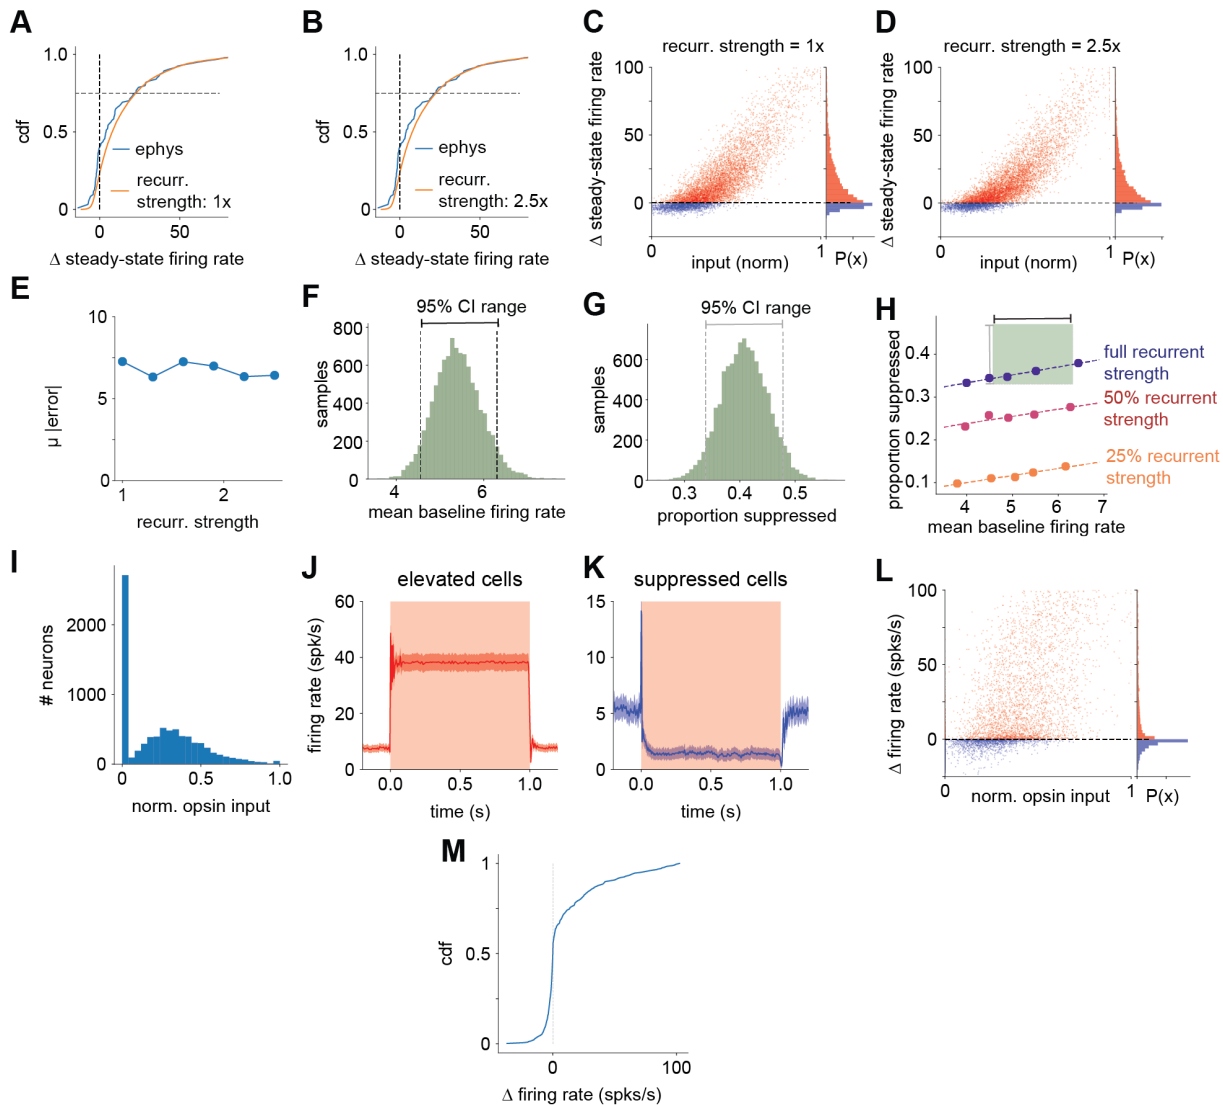

1274

1275 **Figure S8: (A-E): Increasing strength of recurrent connections does not substitute for**  
 1276 **recurrent connection variability.** (A) Cumulative distribution of responses to optogenetic  
 1277 stimulation in model with 1x recurrent strength, matched to the 75<sup>th</sup> percentile of the response  
 1278 measured using electrophysiology. Negligible recurrent variability in this simulation (same  
 1279 number of recurrent connections to each neuron, variability in recurrent strength ~1% of mean,  
 1280 see Methods), and so spread in responses as a function of input is due to optogenetic input  
 1281 variability. Distribution of input is inferred from data in Fig. 6 (lognormal fit; Methods.) (B) Same  
 1282 as (A) but in model with 2.5x recurrent strength. (C) Relationship between input and steady-  
 1283 state response in the model with 1x recurrent strength. Marginal distribution of response show  
 1284 on the right. (D) Same as (C), but in model with 2.5x recurrent strength.  
 1285 Note that both stimulations produce similar variability between input strength and firing rates.  
 1286 This variability is seen as spread in the red cloud of points around an imagined curve that could  
 1287 be fit through the points. (E) Estimated mean absolute error of the relationship between the

1288 input and output as measured by a LOWESS fit across all recurrent strength manipulations. **(F-**  
1289 **H): Sensitivity analysis demonstrates that matching suppression is achievable within**  
1290 **confidence bounds observed baseline firing rates, but only in the network with the**  
1291 **strongest recurrent connectivity strength. (F)** Bootstrapped distribution of baseline firing rate  
1292 estimated from electrophysiology data. 95% confidence intervals are drawn from the  
1293 bootstrapped distribution. **(G)** Bootstrapped distribution of the proportion of the population that is  
1294 suppressed following optogenetic stimulation, estimated from the electrophysiology data. **(H)**  
1295 The network baseline firing rate and recurrent strength were systematically manipulated, finding  
1296 that the only networks that can replicate the proportion of suppression we observe within the  
1297 baseline firing rate we observe are networks with strong recurrent connectivity. **(I-M): Models**  
1298 **with 41% of cells without opsin replicate steady-state dynamics, noisy relationship**  
1299 **between opsin input and steady-state response, and response distribution. (I)** Distribution  
1300 of opsin input was generated by sampling from a lognormal distribution fit to our observed opsin  
1301 fluorescence, and in order to replicate the sparse expression we observed in histology we set  
1302 41% of cells to 0 at random. **(J)** Mean timecourse of response to stimulation in elevated cells  
1303 maintains the same transient and steady state dynamics observed in the main simulations. **(K)**  
1304 Same as (B), but in suppressed cells. **(L)** Relationship between opsin input and steady state  
1305 response remains weak but positive, marginal distribution shown on right. **(M)** Cumulative  
1306 response distribution to stimulation shows typical long tail and large proportion of suppressed  
1307 responses.
